# Supplementary material for: Enlisting wild grass genes to combat nitrification in wheat farming: A nature-based solution
Source: PubMed Central journal article supplement (PMC8536370; doi:10.1073/pnas.2106595118), 2021-08-23
Supplement: pnas.2106595118.sapp.pdf [file pnas.2106595118.sapp.pdf]

## **Supplementary Information**

1  
2  
3  
4 *Title:*

5 **Enlisting wild-grass-genes to combat nitrification in wheat**  
6 **farming: a nature-based solution**

7  
8 \*Guntur V. Subbarao<sup>a,1</sup>, \*Masahiro Kishii<sup>b</sup>, Adrian Bozal-Leorri<sup>c</sup>, Ivan Ortiz-Monasterio<sup>b</sup>,  
9 Xiang Gao<sup>a</sup>, Maria Itria Ibba<sup>b</sup>, Hannes Karwat<sup>b</sup>, M. B. Gonzalez-Moro<sup>c</sup>, Carmen Gonzalez-  
10 Murua<sup>c</sup>, Tadashi Yoshihashi<sup>a</sup>, Satoshi Tobita<sup>d</sup>, Victor Kommerell<sup>b</sup>, Hans-Joachim Braun<sup>b</sup> and  
11 Masa Iwanaga<sup>a</sup>

12  
13 **Email:subbarao@jircas.affrc.go.jp**  
14  
15  
16  
17

18 **This PDF file includes:**

19 Materials and Methods

20 References Cited in the supplementary 'Materials and Methods'

21 Figures S1 to S10

22 Tables S1 to S9  
23  
24  
25  
26  
27  
28  
29  
30  
31

## 1 **Materials and Methods**

### 2 **Study-1. BNI-capacity characterization of wheat varieties released from 1950-2010**

#### 3 Growing plants hydroponically in growth chamber

4 Twenty wheat varieties (Table S1) are grown hydroponically (using 70 L tanks) for 46 days in a walk-in growth  
 5 chamber with day/night temperature regime of 24/20 °C, photoperiod 13/11 h (light/dark) with a light intensity  
 6 averaging of about 300 mmol m<sup>-2</sup> s<sup>-1</sup>; relative humidity is maintained at 70%. Each tank has a styrofoam top with  
 7 eight holes in two rows; each genetic stock is planted four plants (14 days old) per hole and in four holes; in total  
 8 16 plants for each genetic stock and four plants are used for collecting root exudates and considered as one  
 9 replication. There were four replications for each genotype. Plants are grown in full-strength nutrient solutions  
 10 with 2 mM N as NH<sub>4</sub>NO<sub>3</sub> for 37 days from planting (DAP) as described earlier (1); pH of nutrient solutions are  
 11 adjusted to 6.0 – 6.5 once in a day. Nutrient solutions in tanks are replaced with fresh nutrient solutions once in  
 12 every week. From 37 DAP, the nitrogen source is changed to 2 mM N as (NH<sub>4</sub>)<sub>2</sub>SO<sub>4</sub> and plants are grown until  
 13 42 DAP before using them for collecting root exudates.

#### 14 Root exudates collection and BNI activity determination

15 Intact wheat plants of 42 days old are removed from solution tanks, rinsed with deionized water for a few minutes  
 16 and transferred to 2 L bottles containing 1.8L of aerated solutions of 0.5 mM NH<sub>4</sub>Cl + 200 mM CaCl<sub>2</sub> for 24 h,  
 17 followed by another 24 h root exudate collection using 1.0 mM NH<sub>4</sub>Cl + 200 mM CaCl<sub>2</sub>. Four plants are used for  
 18 each genetic stock for collecting root exudates and is considered as one replication. Four replications are used for  
 19 each genotype for collecting root exudates. Root exudates from two collections for each replication are pooled,  
 20 evaporated to dryness using a rotary-evaporator at 45 °C. The residue is extracted with 20 mL methanol. The  
 21 methanol extract is further evaporated to dryness and extracted with dimethyl-sulfoxide (DMSO), which is used  
 22 for determining BNI activity using luciferous recombinant *Nitrosomonas* as described earlier (1). The BNI activity  
 23 of root exudate is expressed in ATU g<sup>-1</sup> root dwt. d<sup>-1</sup> (SI Appendix, Table S1)

### 24 **Study-2a. Characterization of *L. racemosus* for BNI-capacity**

25 *L. racemosus* (*Lam*) Tzvelev (2n=4x=28; genome Ns NsXmXm) were grown from vegetative cuttings in pots  
 26 filled with 13 kg of Andosol (Typic Hapludands, soil pH 5.5) for about one year before using them for collecting  
 27 root exudates. Intact plants with roots were removed from pots and the soil attached to roots was removed and  
 28 considered rhizosphere soil, which was used for soil incubation studies for determining nitrification rates. After  
 29 removing the attached soil from roots, the roots were washed with running tap water initially and finally with  
 30 deionized water before using them for collecting root exudates using the following root exudate collection  
 31 solutions (trap solutions) as follows.

- 32 1. 1<sup>st</sup> day of root exudate collection – aerated solutions of 0.5 mM NH<sub>4</sub>Cl + 200 mM CaCl<sub>2</sub> for 24h
- 33 2. 2<sup>nd</sup> day of root exudate collection – aerated solutions of 1.0 mM NH<sub>4</sub>Cl + 200 mM CaCl<sub>2</sub> for 24h
- 34 3. 3<sup>rd</sup> day of root exudate collection – aerated solutions of 200 mM CaCl<sub>2</sub> for 24h

35 Root exudates of three collections are pooled, and evaporated to dryness, extracted with methanol, and further  
 36 processed as described earlier for other experiments. The root exudate residue is extracted with DMSO  
 37 (dimethylsulfoxide) and BNI activity was determined using a recombinant luminescent *Nitrosomonas* as described  
 38 earlier (1). The BNI activity of root exudate is expressed in ATU d<sup>-1</sup> plant<sup>-1</sup> (Fig. 1b)

### 39 **Study-2b. Characterization of amphiploids derived from wild species for BNI-capacity**

#### 40 Growing plants hydroponically in growth chamber

41 The amphiploid genetic stocks (SI Appendix, Table S2a,b) were grown hydroponically in a walk-in growth  
 42 chamber and the experiment was replicated four times. Plant-growing conditions and the collection of root  
 43 exudates, the processing of root exudates for BNI-activity extraction and determination are the same as the above  
 44 experiments and results are presented in (SI Appendix, Table S2c).

### 45 **Study-3. Bread Wheat and alien addition translocation lines - Plant Materials**

46 Bread wheat and alien chromosome addition/translocation lines used in this study are summarized (SI Appendix,  
 47 Table S2d). Lr#n-SA was transferred into five different CIMMYT wheat lines by sequential backcrossing five to  
 48 seven times. Wild species and wheat-wild species complete or partial amphiploid lines were summarized in (SI  
 49 Appendix, Table S2a). The first nine amphiploids (used in this study) were developed at CIMMYT or with  
 50 collaboration of Utah in 1980-2000's except *T.Tur/E.Mollis* which was donated from Dr. Merker Arnulf (Swedish  
 51 University of Agricultural Sciences) in 1980. The remaining 11 amphiploids evaluated during this study were  
 52 obtained from Prof. Bikram Singh Gill, KSU, USA (SI Appendix, Table S2b).

#### 53 3a. The production of Robertsonian/centromeric and recombinant translocation lines of Lr#n

54 To produce centromeric translocation lines, the disomic addition line of Lr#n was firstly crossed with the 3B or  
 55 7B chromosome monosomic lines (cv. Chinese Spring background; Mono 3B CS; 2n=41=AABBDD) (SI

Appendix, Fig. S4a). The development of the addition lines and homoeology group of Lr#n *L. racemosus* chromosomes were described in previous studies (2-3). The chromosome constitution of F1 plants were  $2n=42$  or 43. The plants of  $2n=42$  were selected using carmine-stained chromosome counting. The presence of Lr#N was further confirmed by GISH. During the meiosis, spindle fibers will attach to both sides of univalent chromosomes of 3B and Lr#N, which then causes chromosome breakages in the centromeric regions at some frequency. The broken chromosome arms are sticky without telomere protection and may fuse each other to become centromeric translocations (SI Appendix, Fig. S4a). The presence of a half arm translocation in F2 progenies was identified by GISH and FISH.

Further reduction of Lr#n-SA was done using *ph1b* mutant which induced recombination between wheat and alien chromosomes and has been heavily used for this purpose in the last several decades (4). CS *ph1b* was crossed with Lr#n-SA and progeny plants with homologous *ph1b* and heterologous Lr#n-SA were selected by GISH and a PCR marker *gwm213* (*gwm213*-F: TGCCTGGCTCGTTCTATCTC; *gwm213*-R: CTAGCTTAGCACTGTCGCC) (SI Appendix, Fig. S5). Tr#3 spontaneously developed without using *ph1* mutant.

#### **In situ hybridization**

Chromosome preparation and FISH/GISH analysis were conducted by the procedure of Dou et al. (5) with minor modifications. Genomic DNA of *L. racemosus* was labelled with a fluorescence molecular, tetramethylrhodamine-5-dUTP (Roche) using random primer method. For FISH analysis, 5 end fluorescein-12-dUTP (FICT) labelled oligonucleotide probes of Oligo-AAG (FITC-(AAG)<sub>10</sub>) and Oligo-pLrtaiI-1 (FITC-CTGATTATAGACATTAGTCCCCCTGGTAGGGACAAACACAGCTTTCTGCAGATGCTCCAT) were obtained from SIGMA. Oligo-AAG makes it possible to identify all wheat B genome chromosomes (6), and Oligo-pLrtaiI-1 can stain Tail family sequences which is present in the short-arm end of Lr#n chromosome (7).

#### **C-banding**

C-banding to identify all 42 wheat chromosomes was conducted the procedure of William and Mujeeb-Kazi (8). Root tips were fixed in 0.1 aceto-carmine for 48 hours and squashed in 45% acetic acid on slides. The chromosomes on slides were stained by immersing the slides in barium hydroxide [Ba(OH)<sub>2</sub>] solution.

### **Study-4. Characterization of *L. racemosus*-CS translocations for BNI-capacity**

#### **4a. 1<sup>st</sup> experiment**

Five *L. racemosus*-CS translocations that include CS, Lr#n addition, Lr#n-SA translocation on 7B, Lr#n-SA translocation on 3B, and Lr#n-LA (long-arm translocation) (Table 1) are evaluated for BNI-capacity. Plants are grown hydroponically for 60 days as described earlier in a walk-in growth chamber as described above for experiments 1-3 and the experiment is replicated four times. Root exudates are collected and processed for BNI-activity as described earlier and results are presented in Table 1.

#### **4b. 2<sup>nd</sup> experiment**

Four genetic stocks that include two *L. racemosus*-CS shortened short-arm of Lr#n translocations along with CS and Lr#n-complete short-arm translocation (Table 2) were evaluated for BNI-capacity. Plants were grown hydroponically using a walk-in growth chamber and growing conditions are the same as described earlier. The only difference is that plants were grown for 49 d (instead of 42 DAP for earlier studies) in nutrient solutions before using them for root exudate collection, i.e. plants were seven days older than those in earlier experiments. Root exudates collection and processing for BNI-activity extraction and determination is same as described for earlier experiments and results are presented in Table 2.

### **Study-5. Characterization of Lr#n-SA translocations (T3BL.3Ns<sup>b</sup>S) in elite-wheats for BNI-capacity**

#### **5a. 1<sup>st</sup> experiment**

Eight genetic stocks representing elite-wheat translocations (Table 3) were evaluated for BNI-capacity in root systems. Plants were grown hydroponically in a walk-in growth chamber for 42 days in nutrient solutions as described earlier. Root exudates are collected using 42 d old intact wheat plants and four replications for each genetic stock. Root exudate collection protocol, BNI-activity extraction and BNI activity determinations were the same as before and results are presented in Table 3.

#### **5b. 2<sup>nd</sup> experiment**

Two genetic stocks (representing BNI-isogenic lines of MUNAL-control and BNI-MUNAL (Lr#n-SA) were evaluated extensively for BNI-capacity in root systems. Plants are grown hydroponically in a walk-in growth chamber for 30 days (30 DAP) before collecting root exudates. Growing conditions are the same as for the earlier experiments except that the pH of the nutrient solutions adjusted to 5.0 to 5.5 during growth period (unlike 6.0 to 6.5 pH in earlier experiments). Plants are grown in nutrient solutions as described earlier using NH<sub>4</sub>NO<sub>3</sub> as N source for three weeks. From 3rd week onwards, the nitrogen source changed to 1 mM N as (NH<sub>4</sub>)<sub>2</sub>SO<sub>4</sub> for one

1 week (i.e. last week of plant growth) before using them for collecting root exudates. Also, plants are grown only for 30 DAP unlike 42 DAP for earlier studies.

Root exudates are collected using intact wheat plants using 1.8 L aerated solutions (in 2L black plastic bottle) of the following compositions as follows:

1. RE-NH<sub>4</sub>-1 (1.8L of aerated solutions of 0.5 mM NH<sub>4</sub>Cl + 200 mM CaCl<sub>2</sub> for 24h – 1<sup>st</sup> day)
2. RE-nutri-NH<sub>4</sub>-1 (1.8L of aerated solutions of 1/4<sup>th</sup> strength nutrient solution with 0.5 mM NH<sub>4</sub>Cl for 24h – 2<sup>nd</sup> day collection)
3. RE-water-1 (1.8L of aerated solution of 200 mM CaCl<sub>2</sub> for 24h – 3<sup>rd</sup> day collection)
4. RE-NH<sub>4</sub>-2 (1.8L of aerated solutions of 1.0 mM NH<sub>4</sub>Cl + 200 mM CaCl<sub>2</sub> for 24h – 4<sup>th</sup> day collection)
5. RE-nutri-NH<sub>4</sub>-2 (1.8L of aerated solutions of 1/4<sup>th</sup> strength nutrient solution with 1.0 mM NH<sub>4</sub>Cl for 24h – 5<sup>th</sup> day collection)
6. RE-water-2 (1.8L of aerated solution of 200 mM CaCl<sub>2</sub> for 24h – 6<sup>th</sup> day collection)

Root exudate samples are stored at 5 °C before processing for extraction and determination of BNI activity as described earlier and the results are presented in Fig. 4.

### **Study-6a. Field validation of the effectiveness of BNI-trait (T3BL.3Ns<sup>b</sup>S) in suppressing soil nitrification, nitrogen uptake and productivity gains in a range of nitrogen inputs using BNI-isogenic lines of MUNAL (MUNAL-control and BNI-MUNAL) – Field study in JIRCAS fields, Tsukuba, Japan.**

A field experiment was established on the second week of November 2019 at JIRCAS experimental station in Tsukuba, Japan (36.05N 140.08E), on a volcanic ash soil (Typic Hapludands) [soil pH 5.5 (1:2.5 soil:water), clay 54.8%, silt 26.3%, sand 18.9%, total carbon = 29.2 mg C g<sup>-1</sup> soil; total N = 2.5 mg N g<sup>-1</sup> soil; and C/N ratio 11.7]. 100 kg P as SSP and K as K<sub>2</sub>SO<sub>4</sub> as basal application at the time of field preparation. The entire field site was mapped for inorganic-N levels based on core soil samples taken at a depth of 0-20 cm. At least four soil samples were taken from each experimental plot. Inorganic-N levels were about 5 mg N kg<sup>-1</sup> soil (NO<sub>3</sub><sup>-</sup> + NH<sub>4</sub><sup>+</sup>) in field plots. This field-site is under normal field management operations and continuously used for various experiments. These fields are not heavily fertilized but are well maintained and have good soil-fertility in general.

Two BNI-isogenic MUNAL-genetic stocks (MUNAL-control and BNI-MUNAL) with three N-treatments (0 kg N, 100 kg N ha<sup>-1</sup>, 250 kg N ha<sup>-1</sup>); N-fertilizer was applied in three equal splits (1<sup>st</sup> N application was on 11<sup>th</sup> December 2019; 2<sup>nd</sup> N application was on 24<sup>th</sup> March 2020; 3<sup>rd</sup> N-application was on 14<sup>th</sup> April). The experimental design is split-plot with N treatment as its main plot and genetic stocks as its subplot; the experiment was replicated four times. Four seedbeds with 1.5 m length (with 0.6 m space between two seedbeds) and 30 cm width formed one experimental unit which is 3 m wide and 1.5 m long in total. Two rows of wheat plants (with 10 cm spacing between plants) are planted in each seedbed. In total there were eight rows of wheat plants for each experimental unit. Four seeds were planted in each hole and two seedlings were grown up to maturity from each hole giving a plant density of 70 plants m<sup>-2</sup>. Nitrogen was applied as ammonium sulphate solutions to the experimental plots to have uniformity in nitrogen distribution. The crop was harvested at maturity during July 2020. For the determination of total biomass production and grain yield, the middle two seedbeds of 1 m length (80 plants in total for each experimental plot) were harvested. After separating the grain, the remaining dry matter was oven dried at 70 °C for 72 h and dry weights were recorded.

#### Soil core sampling

The second split of nitrogen fertilizer application was done on 24<sup>th</sup> March 2020. The soil core sampling was done on 31<sup>st</sup> March 2020 (i.e. seven days after the application of the second dose of N fertilizer). Four soil cores from each seedbed close to plant bases were collected at a depth of 0-20 cm. One seedbed was used for the first soil-core sampling. Soil samples from all four core samplings were pooled to make one composite sample for each replication and these results are presented in (*SI Appendix, Table S4*). The second core-soil sampling was done on 21<sup>st</sup> April (i.e. seven days after the application of the third split of N fertilizer on 14<sup>th</sup> April 2020) and the second seedbed was used for this sampling.

#### Leaf sampling for determination of NRA, GS and leaf nitrate levels

After the second split of N application (i.e. 24<sup>th</sup> march), leaf samples are collected on 3<sup>rd</sup> day, 7<sup>th</sup> day, and 9<sup>th</sup> day (1<sup>st</sup> sampling; data is presented only for 7<sup>th</sup> day). For collecting leaf samples, the most fully expanded leaf sample from 4 plants from each experimental plot and immediately stored in an icebox before analyzing them for NRA and GSA. Part of the leaf samples are stored at -20 °C for determining leaf nitrate levels. Similarly, leaf samples are also collected after the 3<sup>rd</sup> split of N application (14<sup>th</sup> April) in a similar manner (i.e. 3<sup>rd</sup> day, 7<sup>th</sup> day and 9<sup>th</sup> day – 2<sup>nd</sup> sampling) for NRA, GSA and leaf nitrate level determinations. NRA and GSA are determined according

1 to Liu et al. (9); Karwat et al. (10). The data presented for NRA, GSA and leaf nitrate levels were all from leaf  
2 sampling done for 7<sup>th</sup> day from nitrogen fertilizer (ammonium sulphate solutions) application.

### 3 NRA determination in leaf tissue

4 For NRA determinations, 0.5 g of fresh tissue samples were ground in a pre-chilled mortar and pestle on ice in 4  
5 mL of extraction buffer (pH 7.5) consisting of 25 mM K-phosphate, 10 mM cysteine, 1 mM EDTA. 1.0 mL of  
6 supernatant (after 10000 rpm for 10 min at 4 °C) was added to a reaction mixture containing 1.0 mL of 0.1 M K-  
7 phosphate buffer (pH 7.5) and 0.1 M KNO<sub>3</sub>, and 0.5 mL 0.25 mM NADH. Controls were made by adding 0.5 mL  
8 of 0.1 M K-phosphate buffer (pH 7.5) instead of 0.5 mL 0.25 mM NADH. The reaction took place at 25 °C for 60  
9 min. The assay was terminated by the addition of 1% (w/v) sulphanilamide in 3 M HCl. Nitrite was determined  
10 with 1 mL 0.02% (w/v) *N*-naph-thyl-(1)-dihydrochloride. The color was then allowed to develop for 60 min at 25  
11 °C before measuring the absorbance of supernatant (10000 rpm for 5 min) at 540 nm (Biotek Instruments,  
12 Vermont, USA). NR activity was expressed as  $\text{mmol NO}_2^- \text{-N g}^{-1} \text{ protein h}^{-1}$ .

### 13 GSA determination in leaf tissue

14 GSA in leaves was determined based on Liu et al. (9); 0.5 g of leaf tissue was ground in a pre-chilled mortar and  
15 pestle on ice in 4 mL buffer solution (pH=8.0) containing 50 mM Tris-HCl, 2mM DTT, 2mM EDTA, 2 mM  
16 MgSO<sub>4</sub> 7H<sub>2</sub>O. 1.0 mL of supernatant (after 10000 rpm for 10 min at 4°C) was added to a reaction mixture (pH=7.8)  
17 containing 1.0 mL (containing 0.25 mM imidazole, 250 mM MgSO<sub>4</sub> 7H<sub>2</sub>O, 80 mM glutamate sodium, 20 mM L-  
18 cysteine, 2 mM EGTA), 0.5 mL 80 mM hydroxylamine hydrochloride, 0.7mL 30 mM ATP solution was added  
19 and incubated for 30 min at 37°C; a blank was prepared without hydroxylamine hydrochloride. The reaction was  
20 stopped by adding 1mL a reagent containing 0.2 mM TCA, 0.37 M FeCl<sub>3</sub> 6H<sub>2</sub>O, 0.6 M HCl. After 30 min,  
21 homogenate was centrifuged at 10000 g for 5 min, and the supernatant was using spectrophotometer at 540 nm  
22 (Biotek Instruments, Vermont, USA). The unit of GSA was the amount of enzyme catalyzing the formation of 1  
23  $\text{mmol}$  of glutamyl-monohydroxamate per hour. Only results from 1<sup>st</sup> sampling were presented for NR and GS  
24 activities in leaves (*SI Appendix, Table S6*).

### 25 Leaf nitrate determination

26 Leaf nitrate levels are quantified according to Karwat et al. (10). One g of (freeze-thawed) leaf tissue was ground  
27 with 50 mL of deionized water using a blender and the mixture was subjected to centrifuge, and the supernatant  
28 was used for nitrate analysis by auto analyzer (BL-TEC K.K. Tokyo, Japan). Leaf nitrate levels for both the 1<sup>st</sup>  
29 and 2<sup>nd</sup> samplings is presented in *SI Appendix, Table S5*.

### 30 Root-zone-soil sampling

31 Root-zone soil is defined as the soil that is in close proximity to roots (which includes soil that is attached to roots).  
32 On the 16<sup>th</sup> day after 2<sup>nd</sup> split of N application (i.e. 10<sup>th</sup> April), the first root-zone-soils collected from 4 plants.  
33 Intact plant roots were removed from the field. By gently shaking the roots, the loose soil that is in close proximity  
34 to roots that include soil that is attached to roots is removed and considered as root-zone-soil (*SI Appendix, Fig.*  
35 *S7a1*). The soil collected in this manner for four plants were pooled for each experimental plot (about 200 g in  
36 total) and treated as replication. Root-zone-soil was collected from all the experimental plots, i.e. four replications.  
37 A second root-zone-soil collection was made in a similar manner on 30<sup>th</sup> April (16 days after 3<sup>rd</sup> split of N  
38 application). The soil was air dried, sieved (2mm) and stored at 5°C until inorganic-N analysis, pH determinations,  
39 potential nitrification, and other laboratory soil incubation studies.

### 40 Determining potential soil nitrification

41 Potential soil nitrification was determined using a modified protocol of Hart et al. (11). The brief protocol is as  
42 follows: 10 g of root-zone-soil is taken into a 250 ml Erlenmeyer flask and 100 ml of N-potential solution was  
43 added; flask was covered with a breathable sponge-cap and loaded into a temperature-controlled roto-mixer at  
44 250 rpm and incubated at 20°C; 10 mL of the soil slurry from flask was sampled at 24h intervals during a 10 d  
45 period. Soil slurry was subjected to centrifuge and the supernatant was analyzed for NO<sub>2</sub><sup>-</sup> and NO<sub>3</sub><sup>-</sup> using  
46 autoanalyzer (BL-TEC K.K. Tokyo, Japan). The results from potential soil nitrification in root-zone-soil is shown  
47 in *SI Appendix, Fig. S7a*.

### 48 Determining soil nitrification rates

49 The root-zone-soil was air dried and passed through 2-mm sieve and stored at 5°C in a cold room prior to using  
50 for nitrification studies as described earlier (1). The soil water status was maintained at 60% WFPS during the  
51 incubation period of 21days using a temperature and humidity-controlled incubator; incubation temperature was  
52 20°C and RH was at 80%; two g of soil taken in a 10 ml glass bottle and 200 mg N kg<sup>-1</sup> soil as (NH<sub>4</sub>)<sub>2</sub>SO<sub>4</sub> is added  
53 during the incubation period. The other details of the soil incubation study were described earlier (22). The results  
54 for potential-net-nitrification-rate and nitrate percentage of inorganic-N pool (%) in rhizosphere soil collected  
55 (from 1<sup>st</sup> sampling) is shown in Table 4.

### 56 Determination of nitrifier populations in root-zone-soils

57 Soil DNA was extracted from 0.4 g of root-zone-soil using Fast DNA Spin Kit for soil (Mo-Bio, Carlsbad, CA)  
58 according to manufacturer's instructions with slight modifications. The obtained pure DNA was quantified by the  
59 Qubit Quantification Platform dsDNA HS Assay kit (Invitrogen, Carlsbad, CA). Quantitative PCR (qPCR) was

1 performed to assess the abundance of the *amoA* genes of both ammonia-oxidizing bacteria (AOB) and ammonia  
 2 oxidizing archaea (AOA). The detailed protocol was described in our earlier publication (12). The results for AOA  
 3 and AOB populations in root-zone-soils (from 1<sup>st</sup> sampling) is shown in Fig. 5c; *SI Appendix, Fig. S7c*.

#### 4 Determination of N<sub>2</sub>O emissions in rhizosphere soils

5 Soil incubation studies are conducted using air-dried root-zone-soils from MUNAL-control and BNI-MUNAL  
 6 following using Hink et al. (13). Root-zone-soils collected from 250 kg N ha<sup>-1</sup> treatment plots were used for this  
 7 study. Five g of air-dried soil was transferred to 100 mL glass vial (height 12.0 cm; diameter 3.5cm) and incubated  
 8 with 250 mg N kg<sup>-1</sup> soil N as (NH<sub>4</sub>)<sub>2</sub>SO<sub>4</sub> and soil moisture levels were maintained at 70% water holding capacity  
 9 during a 21day incubation period. Glass vials with treatment soils were incubated in the dark at 20°C with 80%  
 10 RH; glass vials were covered with parafilm during the incubation period. 24 h before the gas sampling, glass vials  
 11 were covered with butyl rubber stopper and melamine white screw cap. After 24 h of closure, 30 mL of gas sample  
 12 was taken from the headspace with a 50 ml syringe at different time intervals, 0-5, 7-11, 14, 17, 21 d incubation  
 13 and were injected into 10 ml pre-evacuated vials. After gas sampling, all bottles were ventilated for 2 min, then  
 14 sealed again with butyl rubber stopper or parafilm (depending on sampling schedule). Evaporated water was  
 15 replenished with distilled water on weight basis. The N<sub>2</sub>O concentration in the vials was measured with a gas  
 16 chromatograph (GC-14B, Shimadzu, Tokyo, Japan) using an electron capture detector. The total net amount of  
 17 N<sub>2</sub>O fluxes over the sampling period was obtained by summing N<sub>2</sub>O emission measure days (the N<sub>2</sub>O  
 18 concentration is about 0.378 ppm in the air). N<sub>2</sub>O emission from root-zone-soils (1<sup>st</sup> sampling) is shown in Fig.  
 19 5b; *SI Appendix, Fig. S7b*.

#### 20 Root-zone-soil pH and inorganic-N (NH<sub>4</sub><sup>+</sup> and NO<sub>3</sub><sup>-</sup>) determinations

21 For root-zone-soil inorganic-N determinations, 3 g of soil was extracted with 30 mL of 2N KCl for 30 min using  
 22 a shaker and the mixture is filtered. The filtrate is analyzed for NH<sub>4</sub><sup>+</sup> and NO<sub>3</sub><sup>-</sup> using autoanalyzer (BL-TEC K.K.  
 23 Tokyo, Japan). Soil pH was determined by a water soil ratio of 2.5:1. Results from root-zone-soil pH (for the 1<sup>st</sup>  
 24 sampling) is presented in *SI Appendix, Fig. S7f*.

#### 25 SPAD measurements for chlorophyll concentrations

26 About 10 plants per experimental plot were selected for SPAD measurements using SPAD 502 plus (Konica  
 27 Minolta, Japan); at least two readings from each plant were taken and the average of 20 measurements for each  
 28 experimental plot was made and considered as representative value for the experimental plot. SPAD data presented  
 29 in Fig. S8c comes from measurements taken on 7<sup>th</sup> day after 3<sup>rd</sup> split nitrogen fertilizer application. Wheat plants  
 30 were heading during this sampling time.

#### 31 Potentially mineralizable nitrogen content (PMN) analysis

32 PMN in root-zone-soil (1<sup>st</sup> sampling) is determined following Waring and Bremner (14) and Vazquez et al. (15)  
 33 by anaerobic soil incubation during seven days at 37 °C. The results for PMN in root-zone-soils is presented in *SI*  
 34 *Appendix, Fig. S9c*.

#### 35 d<sup>15</sup>N analysis of grain samples

36 d<sup>15</sup>N and N concentration in grain was determined using a Euro elemental isotope ratio mass spectrometer IRMS  
 37 (Thermo Scientific, Bremen, Germany). The <sup>15</sup>N natural abundance of the sample relative to the standard  
 38 (atmospheric N<sub>2</sub>) was expressed as: d<sup>15</sup>N = [(R<sub>sample</sub>/R<sub>standard</sub>)-1]x1000 (‰), where R represents the isotope ratio  
 39 (<sup>15</sup>N/<sup>14</sup>N) and R<sub>standard</sub> is <sup>15</sup>N/<sup>14</sup>N for atmospheric N<sub>2</sub> that is 0.00368 (d<sup>15</sup>N = 0) (16). These results are presented  
 40 in *SI Appendix, Fig. S9d*.

### 42 **Study-6b. Soil-microcosm study at UPV-EHU, Spain**

43 A greenhouse experiment was established on first week of September 2019 at the University of the Basque  
 44 Country (UPV-EHU) in Leioa, Spain (43.32 N 2.96W) with a clay loam soil (Hypercalcic Kastanozem) [soil pH  
 45 8.0 in H<sub>2</sub>O, clay 31.9%, silt 24.7%, sand 43.4%, organic matter 21.2 mg g<sup>-1</sup> soil; 1.6 mg total N g<sup>-1</sup> soil; and C:N  
 46 ratio 8.15]. BNI-Isogenic lines of MUNAL-control and BNI-MUNAL were sown in 1.5L pots and grown in a  
 47 greenhouse under a daily regimen of 14/10 h of light/darkness respectively, with an average day/night temperature  
 48 of 25/18 °C and relative humidity of 50/60%. Nitrogen was applied as ammonium sulphate in a single application  
 49 at an equivalent dose of 200 kg N ha<sup>-1</sup>. Soil moisture was adjusted at 60% water-filled pore space (WFPS) during  
 50 the 30 d growth period. Soil samples were taken 30 days after N fertilization; soil mineral N measurements, DNA  
 51 extraction and qPCR analysis were done according to Torralbo et al. (17). These results are presented in *SI*  
 52 *Appendix, Table S4b*.

### 54 **Study-6c. Field experiments in Mexico for yield potential evaluations on BNI-wheats**

55 Yield potential of BNI-isogenic lines of MUNAL-control, BNI-MUNAL, ROELFS-control, and BNI-ROELFS  
 56 were measured in Obregon, Mexico (27°24'N,109°5'W, 38m) in two growing seasons 2018/2019 and 2019/2020.  
 57 The crop was sown in the end of November and harvested approximately five months later in the end of the  
 58 following April. The soil type of the field station is a Coarse Sandy-Clay and the soil pH is 7.7 (10). The plot size

was 4 m × 1.6 m, with two replications. All nitrogen was applied at the time of sowing with the rate of 250 kg N ha<sup>-1</sup>. These results are presented in *SI Appendix, Table S9*. These fields are part of CIMMYT experimental station, managed by the wheat breeding programs and are well fertilized. The grain yields reported here are within the range expected for ‘MUNAL’ in this region.

#### Study-6d. Analysis of grain quality parameters

Grain protein (GPRO, 12.5% moisture basis) content was measured using near-infrared spectroscopy (DA 7200 NIR, Perten Instruments, Sweden), with a calibration validated using Leco®/Dumas method (correction factor: 5.83. Equipment FP828 Leco Instruments, St Joseph, Michigan, USA). The grain samples were tempered with water according to the official AACC method 26-95 (18) and milled using a Brabender Senior mill (C.W. Brabender OHG, Germany). The obtained flour was used for the sodium dodecyl sulfate (SDS) sedimentation test (SDSS), according to the modified protocol described in Peña et al. (19). Flour protein (FPRO) (14% moisture basis) was determined using FT-near infrared spectroscopy (Antaris II, Thermo Scientific, Massachusetts, USA) calibrated based on Leco®/Dumas method (correction factor: 5.70. Equipment FP828 Leco Instruments. St. Joseph, Michigan, USA). The bread baking test was performed according to the AACC method 10-09 (13) using 100 g of refined flour. Bread loaf volume (LV) was determined by rapeseed displacement (AACC 10-05.01). Bread crumb structure was rated by an expert baker using values ranging from very good to poor.

#### HMW-GS and LMW-GS extraction and separation

The glutenin fraction was obtained according to Singh et al. (20) with some modifications. Specifically, 20 mg of whole-meal flour was mixed (1400 rpm) with 0.75 ml of 50% propanol (v/v) for 30 min at 65°C in a Thermomixer Comfort (Eppendorf). The tubes were centrifuged for 2 min at 10000 rpm, and the supernatant containing the gliadins was discarded. The same process was repeated twice to remove any remaining gliadins. The remaining pellet was then mixed with 0.1 ml of a 1.5% (w/v) DTT solution obtained with 50 µL of propanol at 50% and 50 µL of Tris-HCl 0.08M pH 8.0. The mixture was then mixed in a Thermomixer for 30 min at 65°C and 1400 rpm and centrifuged for 2 min at 10000 rpm. A volume of 0.1 ml of a 1.4% (v/v) vinylpyridine solution obtained with 50 µL of propanol at 50% and 50 µL Tris-HCl 0.08M pH 8.0, was added to the tube, mixed in a Thermomixer for 15 min at 65°C and at 1400 rpm, and finally centrifuged for 5 min at 13000 rpm. The supernatant containing the glutenins was then transferred to a new tube and mixed with the same volume of extraction buffer (Tris-HCl 0.1M, 2% SDS (w/v), 40% glycerol (w/v), and 0.02% (w/v) bromophenol blue, pH 6.8) and incubated in the Thermomixer for 5 min at 90°C and 1400 rpm. The tubes were centrifuged for 5 min at 10000 rpm, and 6 µl of the supernatant were used to load the gels. Glutenins were separated in polyacrylamide gels (15% T) prepared using 1M Tris buffer, pH of 8.5. Gels were run at 12.5 mA per gel for about 20 h. The Glu-1 and Glu-3 alleles were classified using the systems developed by Jackson et al. (21) and Branlard et al. (22). Seed protein quality and breadmaking quality results are presented in *SI Appendix, Table S8*.

### References Cited in the supplementary ‘Materials and Methods’

1. G. V. Subbarao, T. Ishikawa, O. Ito, K. Nakahara, H. Y. Wang, W. L. Berry, A bioluminescence assay to detect nitrification inhibitors released from plant roots: a case study with *Brachiaria humidicola*. *Plant Soil* **288**, 101-112 (2006).
2. O. U. Edet, J. S. Kim, M. Okamoto, T. Takeda, M. Kishii, Y. S. A. Gorafi, H. Tsujimoto, Efficient anchoring of alien chromosome segments introgressed into bread wheat by new *Leymus racemosus* genome-based markers. *BMC Genet* **19**, 18 (2018), doi: 10.1186/s12863-018-0606-1.
3. M. Kishii, T. Yamada, T. Sasakuma, H. Tsujimoto, Production of wheat-*Leymus racemosus* chromosome addition lines. *Theor Appl Genet* **109**, 255-260 (2004).
4. E. R. Sears, An induced mutant with homoeologous pairing in common wheat. *Can J Genet Cytol* **19**, 585-593 (1977).
5. Q. W. Dou, H. Tanaka, N. Nakata, H. Tsujimoto, Molecular cytogenetic analysis of hexaploidy lines spontaneously appearing in octoploid Triticale. *Theor Appl Genet* **114**, 41-47 (2006).
6. A. Cuadrado, T. Schwarzacher, N. Jouve, Identification of different chromatin classes in wheat using *in situ* hybridization with simple sequence repeat oligonucleotides. *Theor Appl Genet* **101**, 711-717 (2000).
7. M. Kishii, K. Nagaki, H. Tsujimoto, T. Sasakuma, Exclusive localization of tandem repetitive sequences in subtelomeric heterochromatin regions of *Leymus racemosus* (Poaceae, Triticeae). *Chromosome Res* **7**, 519-529 (1999).

- 1 8. M. D. H. M. William, A. Mujeeb-Kazi, Biochemical and molecular diagnostics of *Thinopyrum*  
2 *bessarabicum* chromosomes in *Triticum aestivum* germplasm. *Theor Appl Genet* **90**, 952-956  
3 (1995).
- 4 9. M. Liu, D. Tang, Y. Shi, Y. Li, Q. Zhang, J. Ruan, Short-term inhibition of glutamine synthetase  
5 leads to reprogramming of amino acid and lipid metabolism in roots of leaves of tea plant (*Camellia*  
6 *sinensis* L.). *BMC Plant Biol* **19**, 1-17 (2019).
- 7 10. H. Karwat, M. A. Sparke, F. Rasche, M. J. Arango *et al.*, Nitrate reductase activity in leaves as a  
8 plant physiological indicator of *in vivo* biological nitrification inhibition by *Brachiaria humidicola*.  
9 *Plant Physiol Biochem* **137**, 113-120 (2019).
- 10 11. S. C. Hart, J. M. Stark, E. A. Davidson, M. K. Fireston, Nitrogen mineralization, immobilization  
11 and nitrification. *In: Methods of Soil analysis, Part 2, Microbiological and Biochemical Properties*  
12 (pp. 985-1018). Madison, WI: Soil Science Society of America (1994).
- 13 12. P. S. Sarr, Y. Ando, S. Nakamura, S. Deshmipande, G. V. Subbarao, Sorgoleone release from  
14 sorghum roots shapes the composition of nitrifying populations, total bacteria, and archaea and  
15 determines the level of nitrification. *Biol Fertil Soils* **56**, 145-166 (2020).
- 16 13. L. Hink, C. Gubry-Rangin, G.W. Nicol, J. I. Prosser, The consequences of niche and physiological  
17 differentiation of archaeal and bacterial ammonia oxidisers for nitrous oxide emissions. *ISME J* **12**,  
18 1084-1093 (2018).
- 19 14. S.A. Waring, J. M. Bremner, Ammonium production in soil under waterlogged conditions as an  
20 index of nitrogen availability. *Nature* **201**, 951-952 (1964).
- 21 15. E. Vazquez, N. Teutscherova, M. Dannenmann, P. Tochterle, K. Butterbach-Bahl, M. Pulleman, J.  
22 Arango, Gross nitrogen transformations in tropical pasture soils as affected by *Urochloa* genotypes  
23 differing in biological nitrification inhibition (BNI) capacity. *Soil Biol Biochem* **151**, 1-10 (2020).
- 24 16. A. R. Jones, R. C. Dalal, Enrichment of natural <sup>15</sup>N abundance during soil N losses under 20 years  
25 of continuous cropping. *Sci Total Environ* **574**, 282-287 (2017).
- 26 17. F. Torralbo, S. Menendez, I. Barrena, J.M. Estavillo, D. Marino, C. Gonzalez-Murua, Dimethyl  
27 pyrazol-based nitrification inhibitors effect on nitrifying and denitrifying bacteria to mitigate N<sub>2</sub>O  
28 emission. *Scientific Reports* **7**, 1-11 (2017).
- 29 18. American Association of Cereal Chemists, *Approved Methods of the AACC*, St. Paul, MN, USA  
30 (2010).
- 31 19. R. J. Pena, S. Amaya, A. Rajaram, A. Mujeeb-Kazi, Variation in quality characteristics associated  
32 with some spring 1B/1R translocation wheats. *J Cereal Sci* **12**, 105-112 (1990).
- 33 20. N. K. Singh, K.W. Shepard, G.B. Cornish, A simplified SDS-PAGE procedure for separating LMW  
34 subunits of glutenins. *J Cereal Sci* **14**, 203-208 (1991).
- 35 21. E. A. Jackson, M. H. Morel, T. Sontag-Strohm, G. Branlard, E.V. Metakovsky, R. Redaelli, Proposal  
36 for combining the classification systems of alleles of *Gli-1* and *Glu-3* loci in bread wheat (*Triticum*  
37 *aestivum* L.). *J Genet Breed* **50**, 321-336 (1996).
- 38 22. G. Branlard, M. Dardevet, N. Amiour, G. Igrejas, Allelic diversity of HMW and LMW glutenin  
39 subunits and omega-gliadins in French bread wheat (*Triticum aestivum* L.). *Genet Resour Crop Evol*  
40 **50**, 669-679 (2003).
- 41



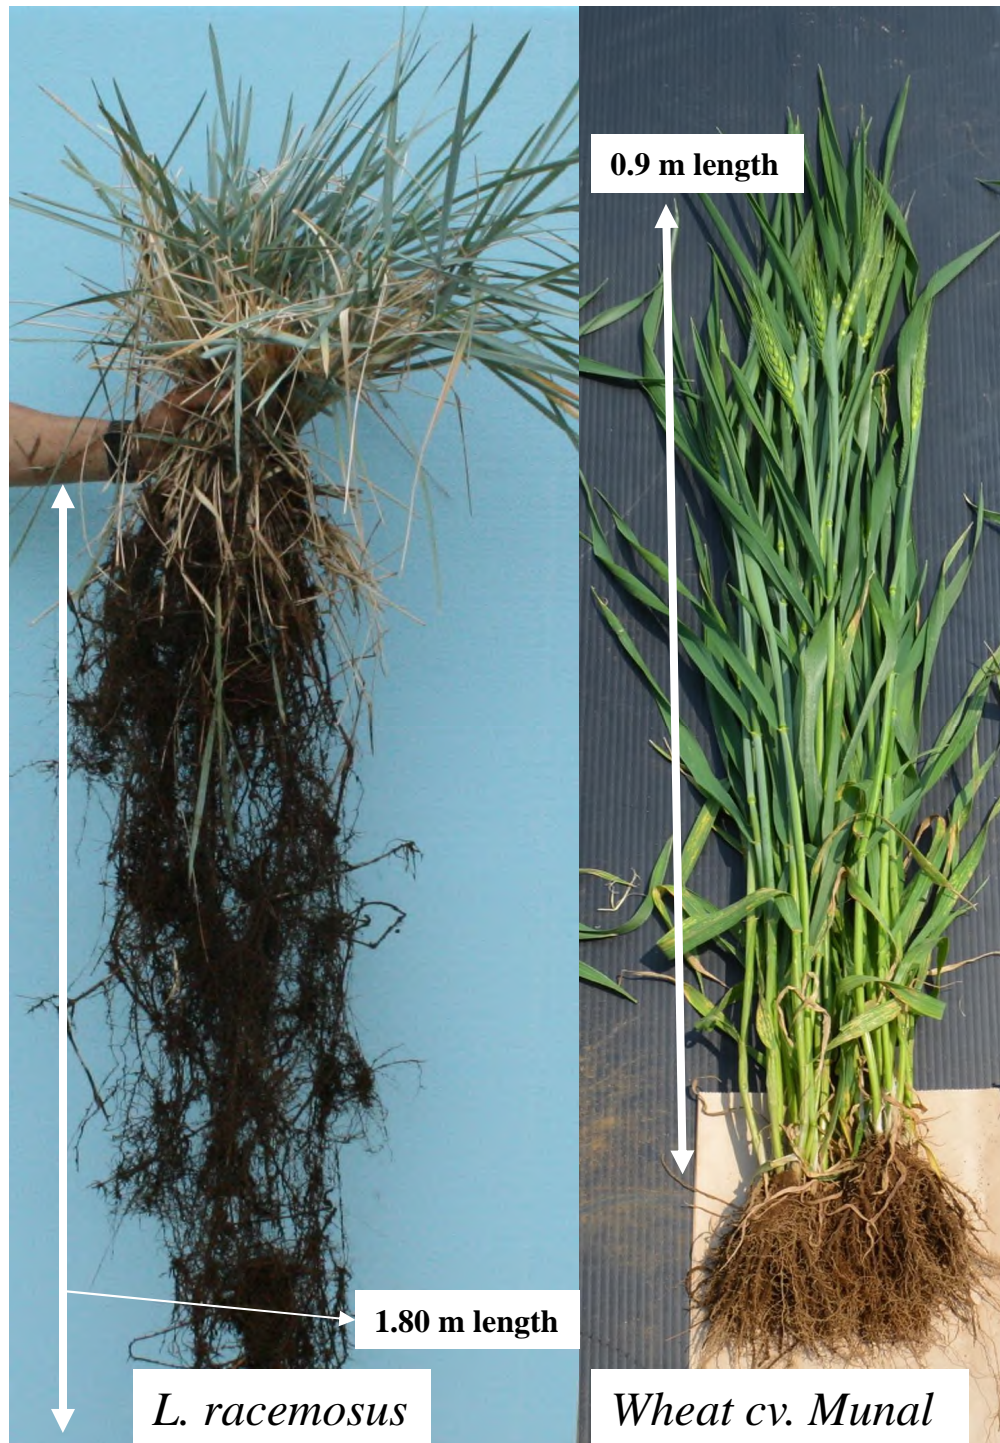

**Fig. S1. Wild-grass (*L. racemosus*) forms extensive root system.**

plants in this picture are grown in 13 kg soil pots for about one year. Root systems in this picture are massive fibrous roots which are close to 2 m long (study-2a).

Cultivated wheat cv. MUNAL grown in the field with the same soil-type for 120 d (250 kg N ha<sup>-1</sup> treatment field plots) (JIRCAS field study-6a; 2019-20)

| Serial No. | Treatment               | Total inorganic-N<br>(NH <sub>4</sub> <sup>+</sup> +NO <sub>3</sub> <sup>-</sup> ) in soil (ppm) at<br>the end of incubation period |      |      |
|------------|-------------------------|-------------------------------------------------------------------------------------------------------------------------------------|------|------|
|            |                         | Nitrate percentage of inorganic-N pool<br>(%)                                                                                       |      |      |
|            |                         | Mean                                                                                                                                | Mean | SE   |
| 1          | Control                 | 583.5                                                                                                                               | 97.1 | 0.4  |
| 2          | Leymus-bulk soil        | 611.3                                                                                                                               | 67.9 | 1.33 |
| 3          | Leymus-rhizosphere soil | 617.5                                                                                                                               | 38.5 | 0.93 |

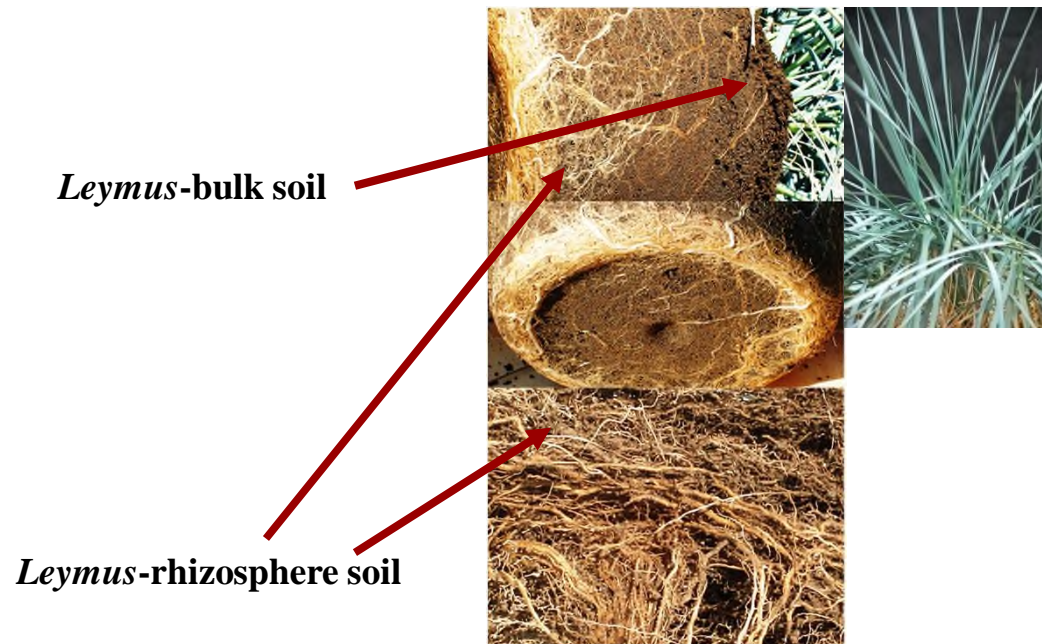

**Fig. S2.** Nitrate percentage of inorganic-N pool in *Leymus*-rhizosphere soil and *Leymus*-bulk soil and in control soil after 60 d incubation period using soil-microcosm study (Study-2a); Two g of air-dried soil samples were incubated with 400 mg of NH<sub>4</sub><sup>+</sup>-N [as (NH<sub>4</sub>)<sub>2</sub>SO<sub>4</sub>] at 20 ° C with RH of 80% in a temperature-humidity controlled incubator for 60 d period before determining nitrification rate. Soil incubation protocol as described earlier (22). *Leymus* plants are grown in 13 kg soil pot<sup>-1</sup> for about one year before using rhizosphere soils and bulk soil from the potted plants for this soil-microcosm study; control soil is the same soil maintained in a separate pot without plants but watered and fertilized in the same way as the *Leymus* planted soil in the pot. Soil nitrification (%) = [soil-NO<sub>3</sub><sup>-</sup> / (soil-NO<sub>3</sub><sup>-</sup> + soil-NH<sub>4</sub><sup>+</sup>) X 100]. (Values are means ± SE of four replications).

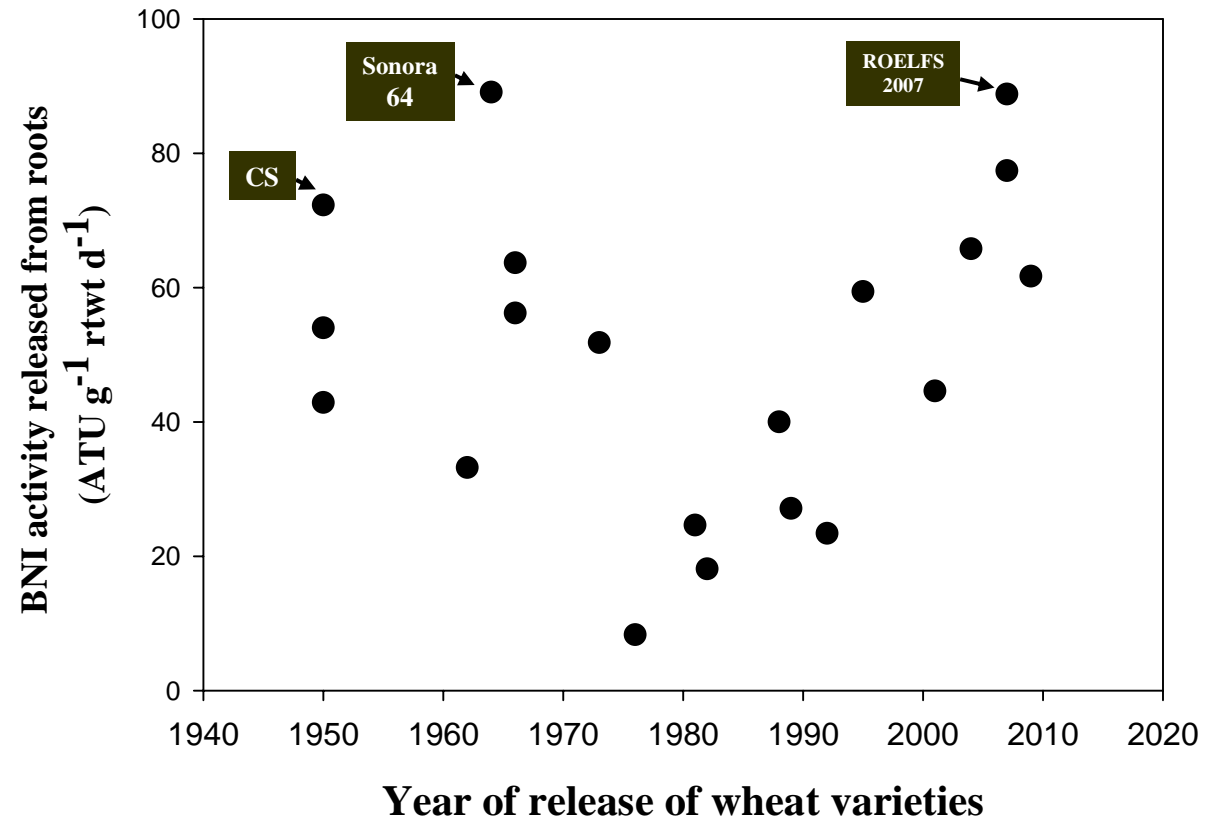

**Fig. S3. Year of wheat varieties released and their BNI-capacity in root systems (based on Study-1).** These results suggest no relationship between wheat breeding under high-N input conditions to BNI-capacity in root systems (Study-1; Based on the data presented in Table S1 (*Each data point is mean of four replications*)).

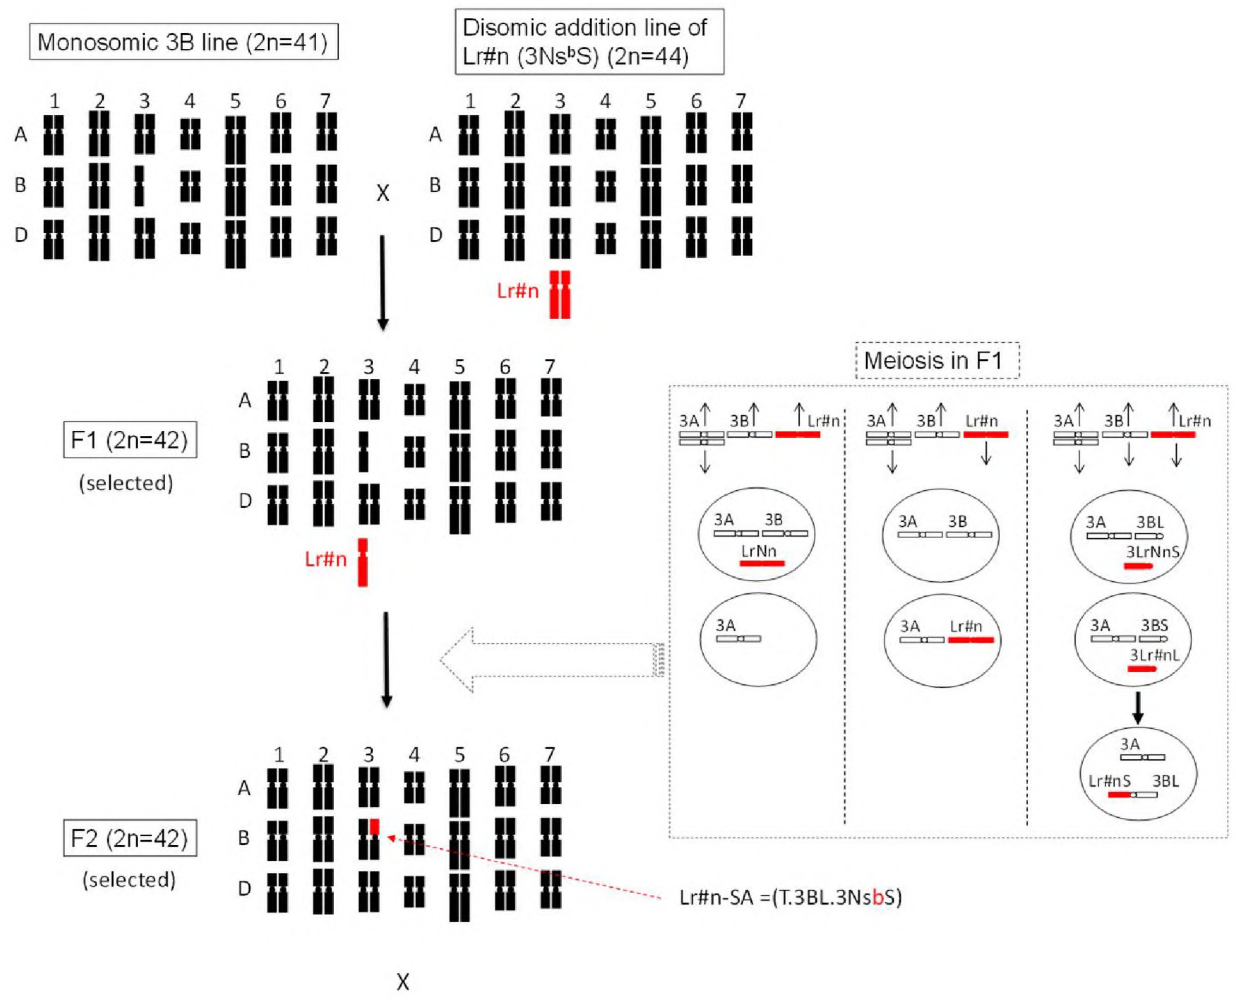

**Fig. S4a. Development of centromeric translocation lines using wheat monosomic lines.** The development of Lr#n-SA (T3BL.3NsbS) is shown as example.



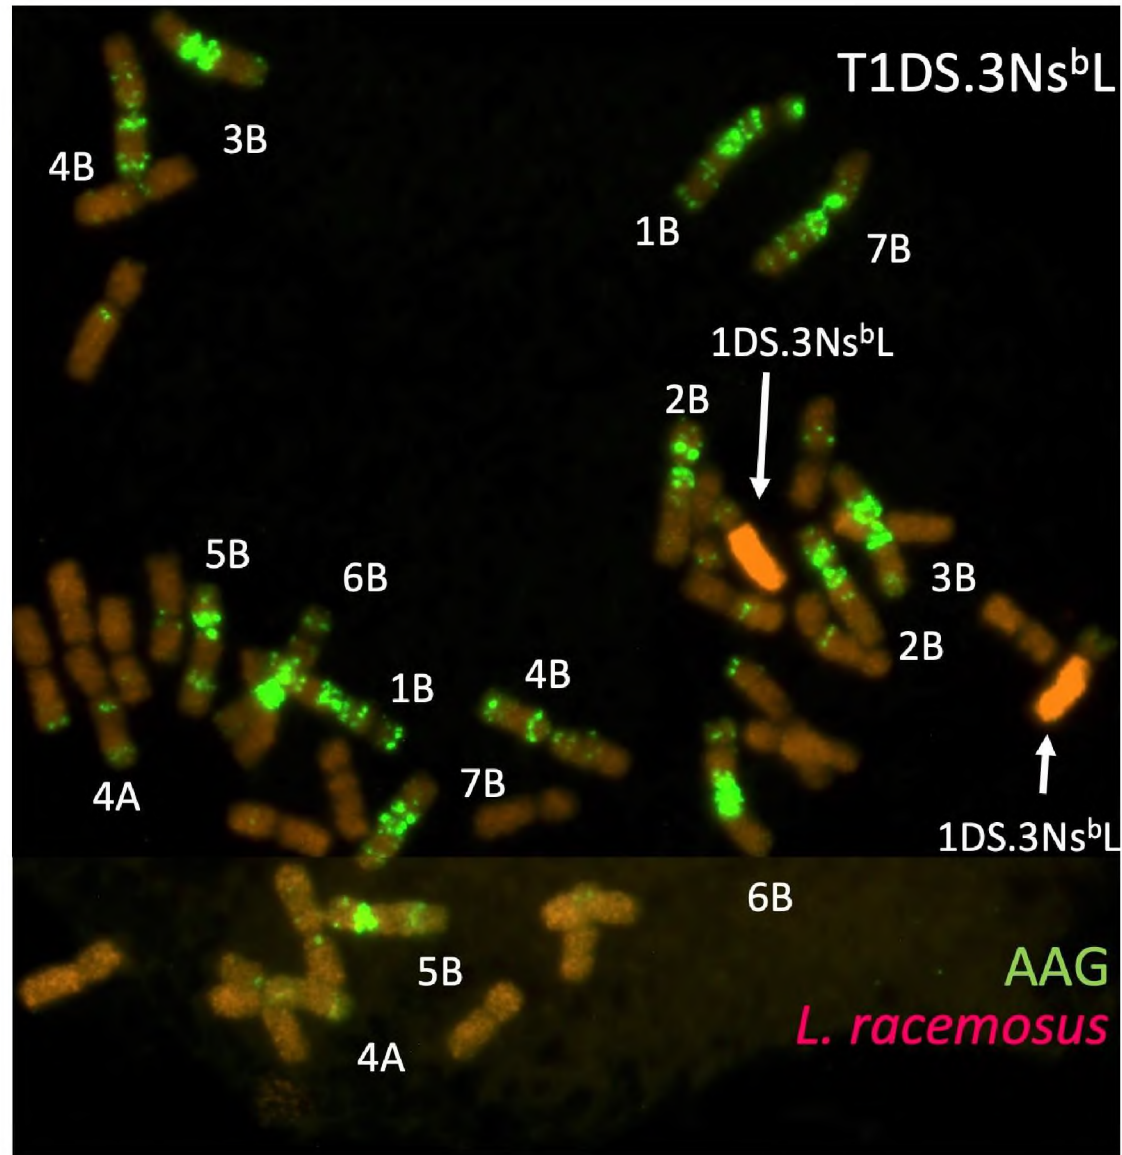

Figure S4b. Lr#n-LA complete long-arm translocation on wheat chromosome 3B in 'Chinese Spring'

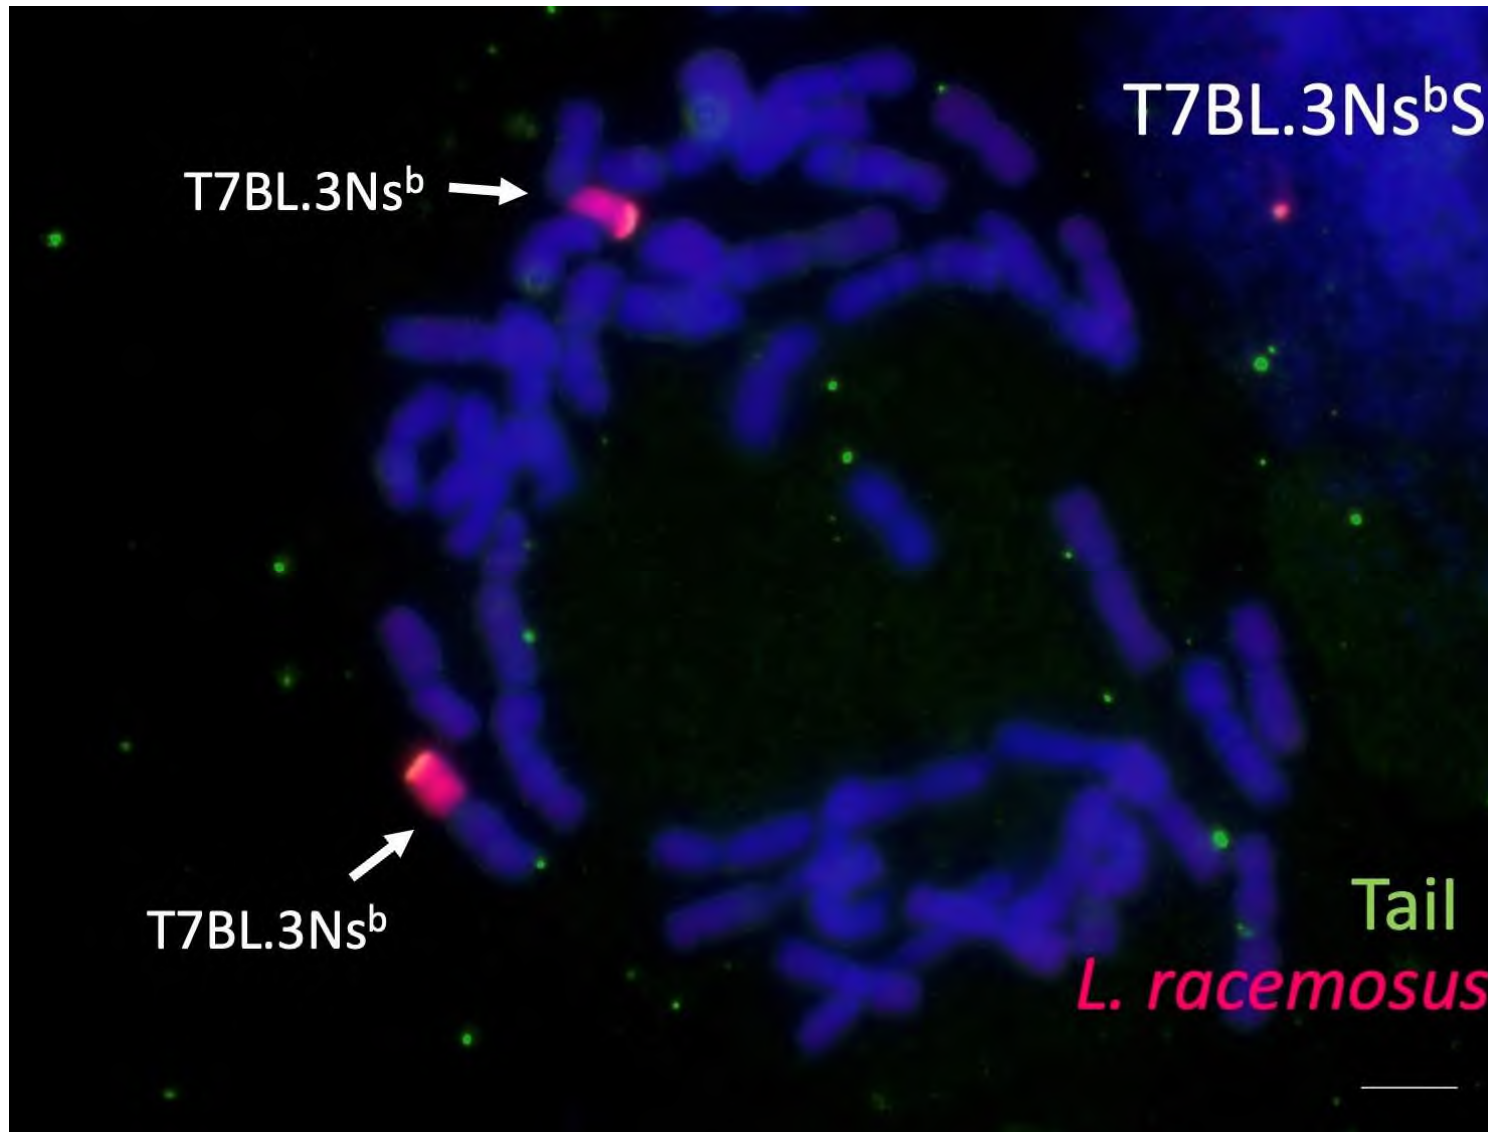

Figure S4c. Lr#n-SA complete short-arm translocation on wheat chromosome 7B translocation in 'Chinese Spring'

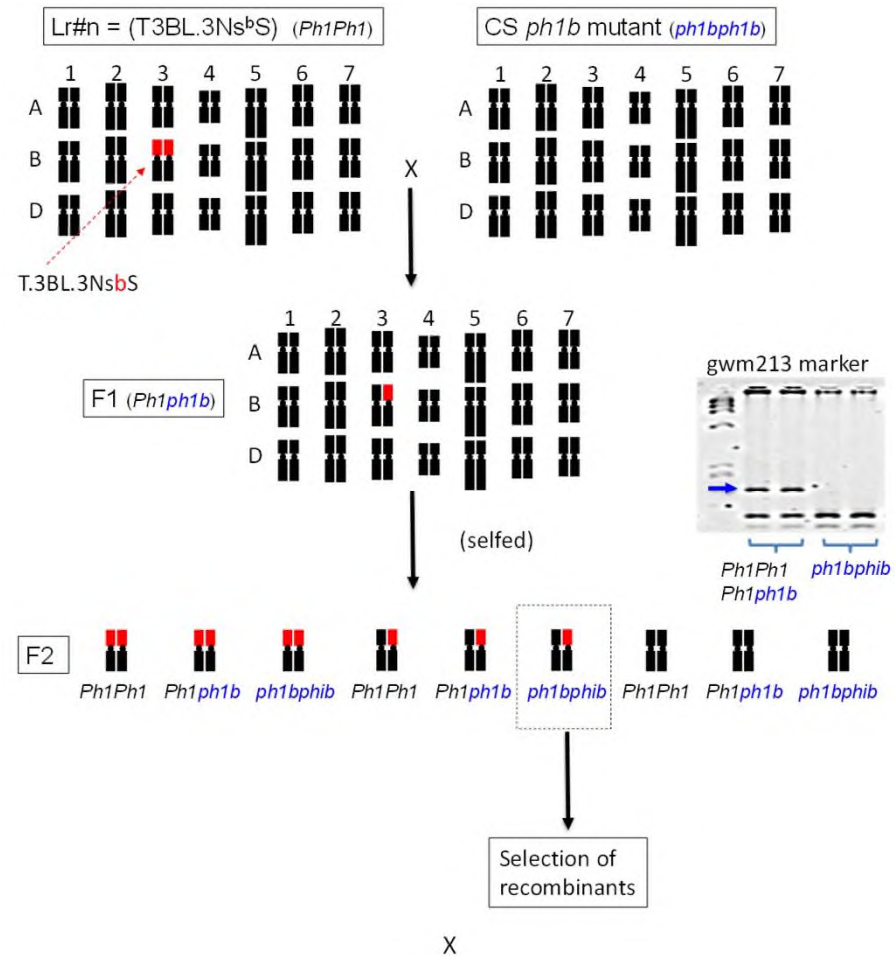

**Fig. S5. Shortening of Lr#n-SA (T3BL.3Ns<sup>b</sup>S) translocation lines using CS ph 1b line.** Lr#n-SA (T3BL.3Ns<sup>b</sup>S) is initially crossed with CS ph1b mutant where, in F1, where plants are heterozygous in Lr#n-SA and *ph1b*. In F2, the plants that are heterozygous in Lr#n-SA and homozygous in *ph1b* were selected for shortening chromosome segment size of Lr#n-SA. The selection in F2 was done by GISH for Lr#n-SA and gwm213 SSR marker for *ph1b*.

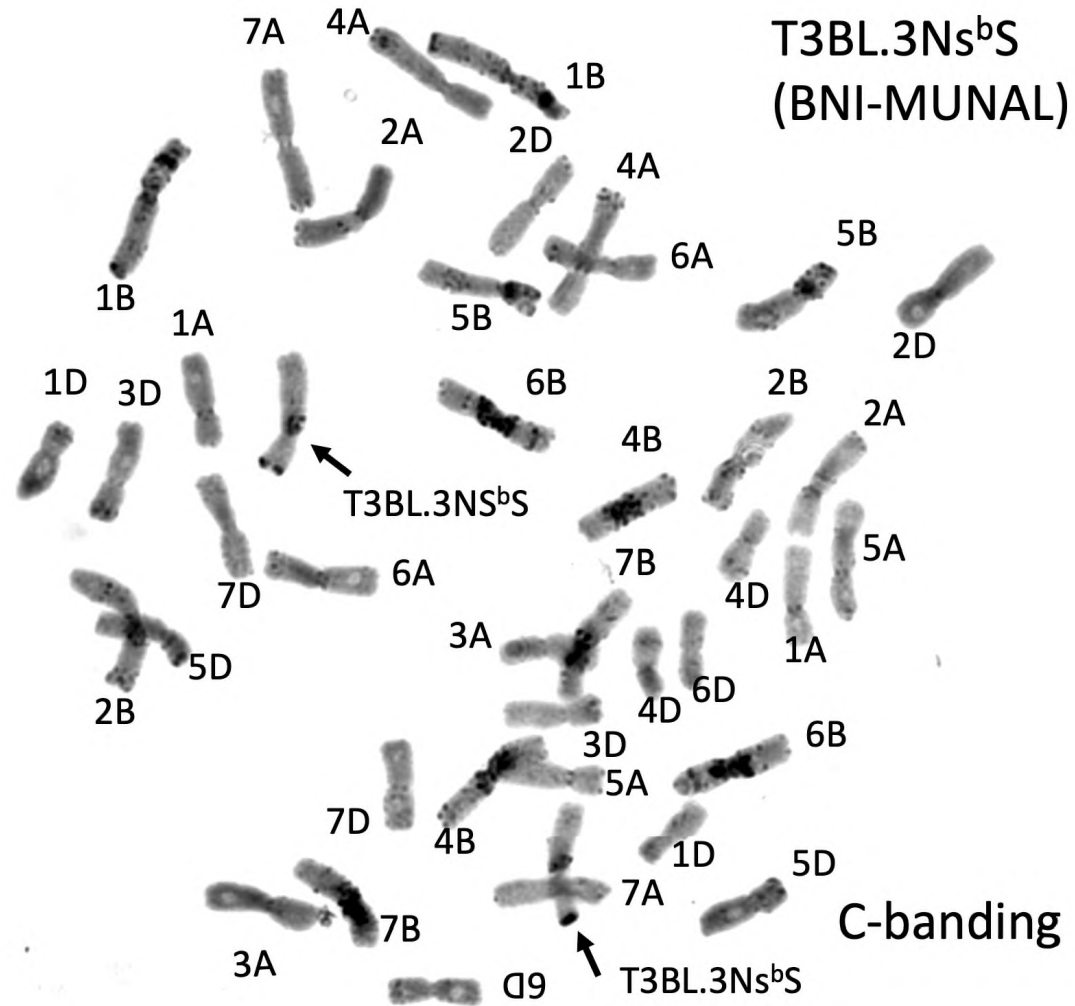

**Figure S6a. Karyotype analysis (C-banding image) for 'BNI-MUNAL (T3BL.3Ns<sup>bS</sup>)' showing Lr#n-SA translocation (complete short-arm) on wheat chromosome 3B**



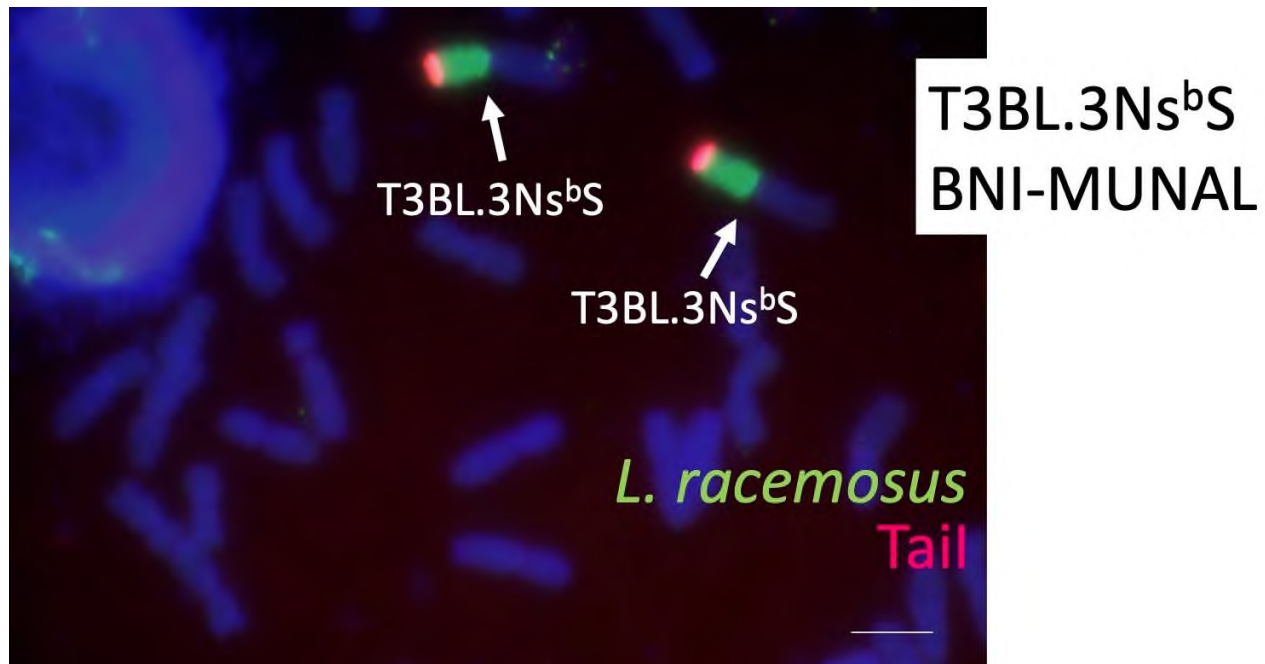

**Figure S6b. Karyotype analysis for 'BNI-MUNAL (T3BL.3Ns<sup>b</sup>S)'** showing Lr#n-SA translocation (complete short-arm) on wheat chromosome 3B (red: Tail family probe, green: *L. racemosus* genomic DNA)

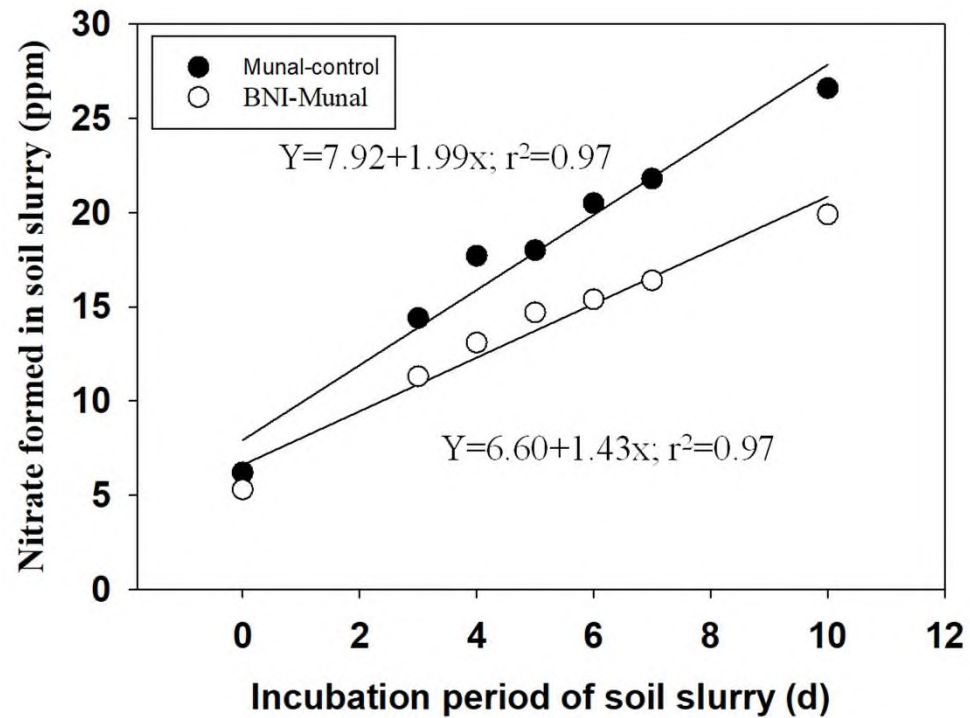

**Fig. S7a.** Potential nitrification in root-zone-soils collected from field grown plants of MUNAL-control and BNI-MUNAL (BNI-Isogenic lines, Field study-6a); soils were collected from 250 kg N ha<sup>-1</sup> treatment field plots; Slopes of regression lines are significantly different ( $P < 0.001$ ) based on ANCOVA (analysis of covariance). Root-zone-soils were collected on 16<sup>th</sup> day after application of 2<sup>nd</sup> split of nitrogen application; Each data point represent mean of 2 replications (soils from 2 replications are pooled and considered as one replication).

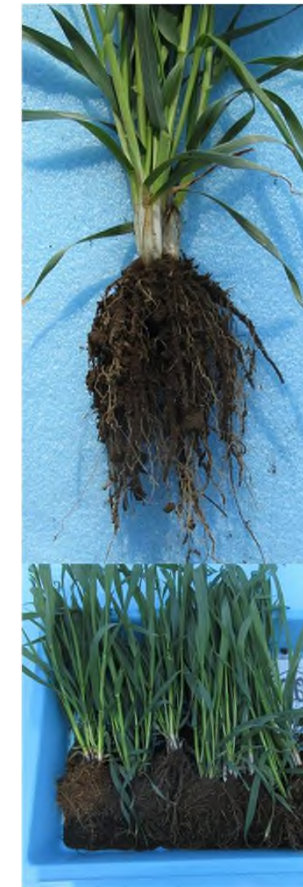

**Fig. S7a1.** Field grown wheat plant roots showing soil attached to roots (Field study-6a), which is considered as part of root-zone-soils, used for various soil incubation studies to characterize BNI function

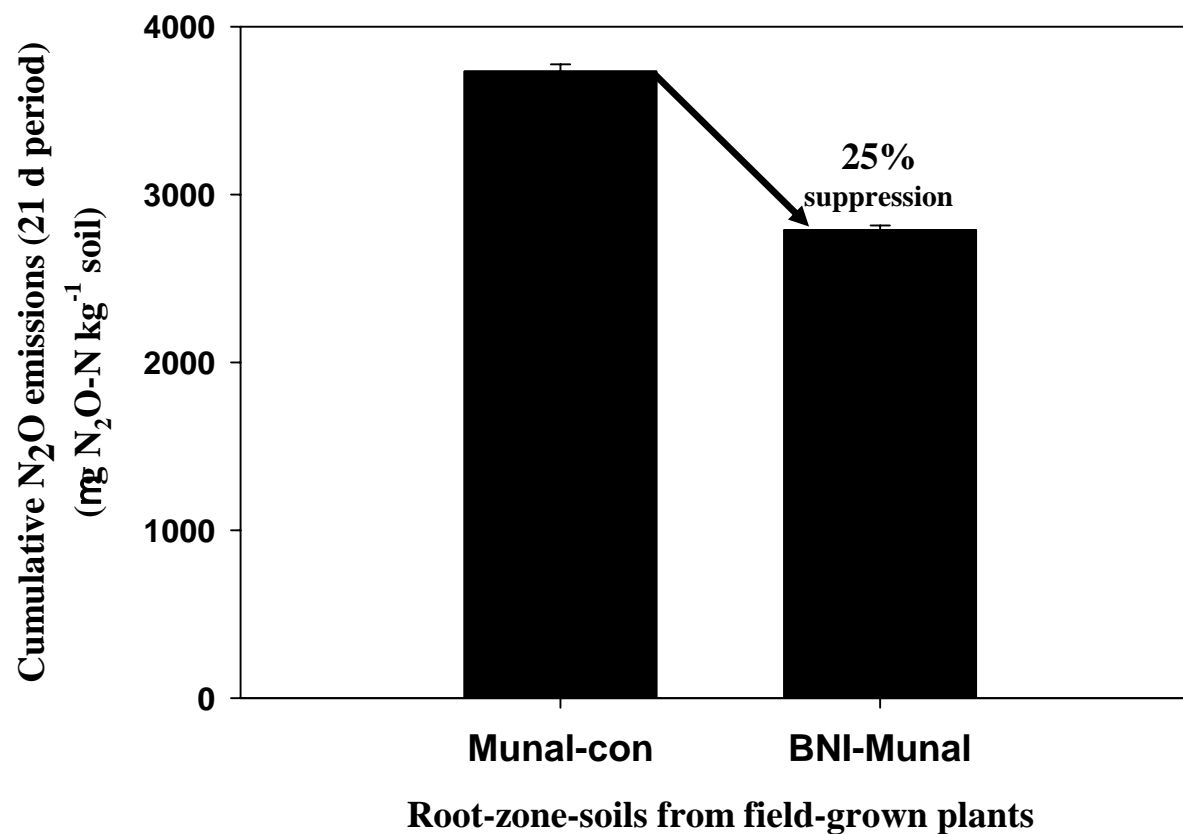

**Fig. S7b. Cumulative N<sub>2</sub>O emissions from root-zone-soils collected from MUNAL-control and BNI-MUNAL (BNI-Isogenic lines; Field study-6a).** Root-zone-soils are collected on 16<sup>th</sup> day from 250 kg N ha<sup>-1</sup> field-plots after application of 2<sup>nd</sup> split of nitrogen fertilizer applications. Five g of soil was incubated for 21d using 100 ml glass vial at 20 ° C with 80% relative humidity in the incubator. Soils were incubated with 250 mg N kg<sup>-1</sup> soil as (NH<sub>4</sub>)<sub>2</sub>SO<sub>4</sub> and moisture levels were maintained at 70% WFPS during the incubation period (*Values are means ± SE of four replications*). N<sub>2</sub>O emissions were monitored daily during 21 d period (also see Fig. 5b) and cumulative N<sub>2</sub>O emissions during the incubation period are presented here. Based on two-way ANOVA using GLM model with SYSTAT 11.0; SE of LS mean = 117.8; Root-zone-soils collected from BNI-MUNAL have significantly ( $P < 0.01$ ) lower N<sub>2</sub>O emissions than MUNAL-control.

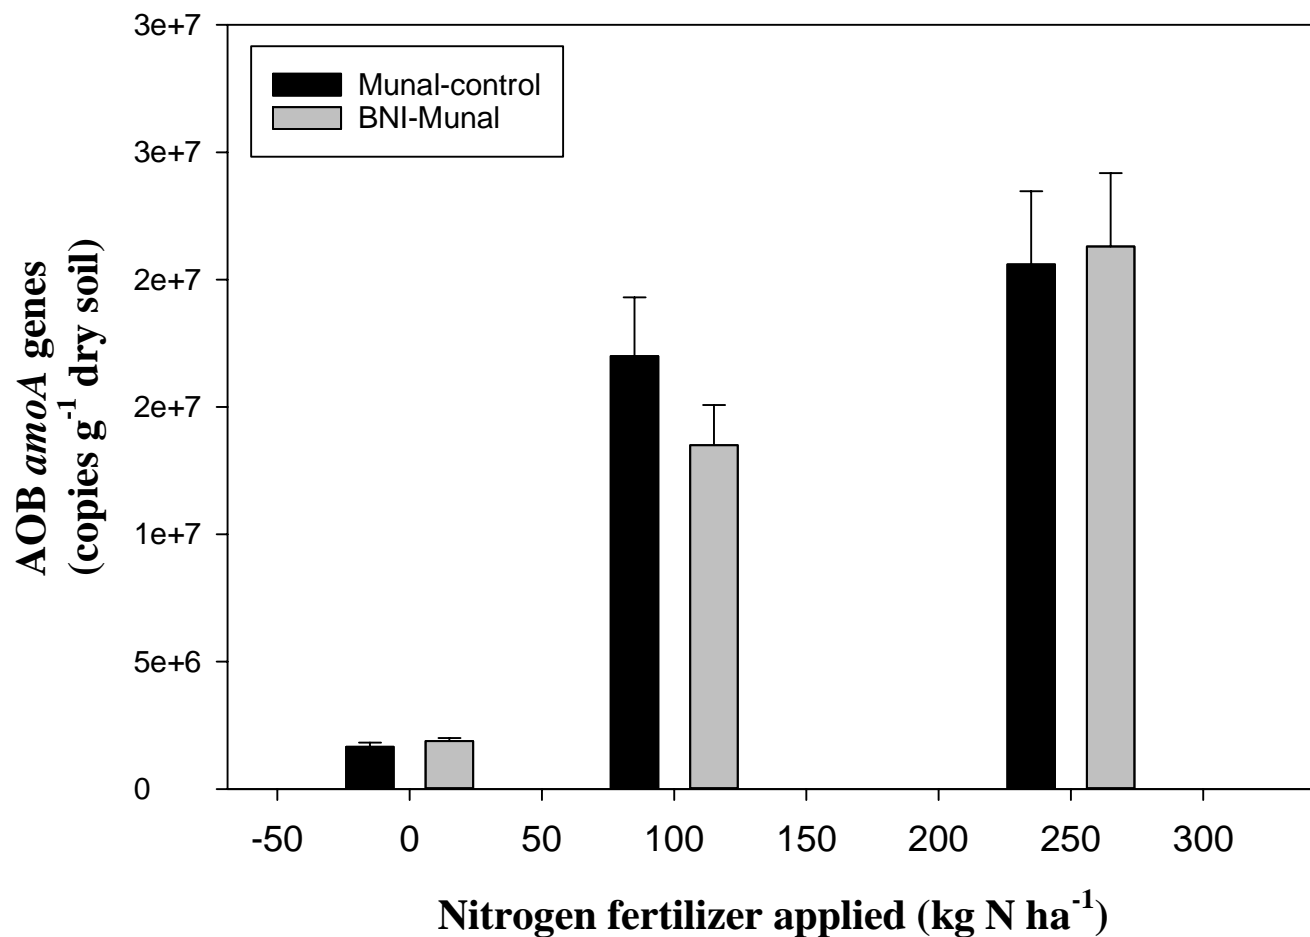

**Fig. S7c. AOB populations in root-zone-soils of field grown plants of BNI-Isogenic lines (MUNAL-control vs BNI-MUNAL; Field study-6a, soil pH is 5.0 to 5.5).** Results suggest that BNI-MUNAL suppress AOA more effectively compared to AOBs (also see Fig. 5b). Root-zone-soil samples are taken after 16<sup>th</sup> day after of 2<sup>nd</sup> split nitrogen fertilizer. Values are means  $\pm$  SE of four replications (Based on three-way analysis of data using GLM model with SYSTAT 11.0; Genetic stock effect on AOB are non-significant; but N-treatment effects on AOB are significant ( $P < 0.001$ )).

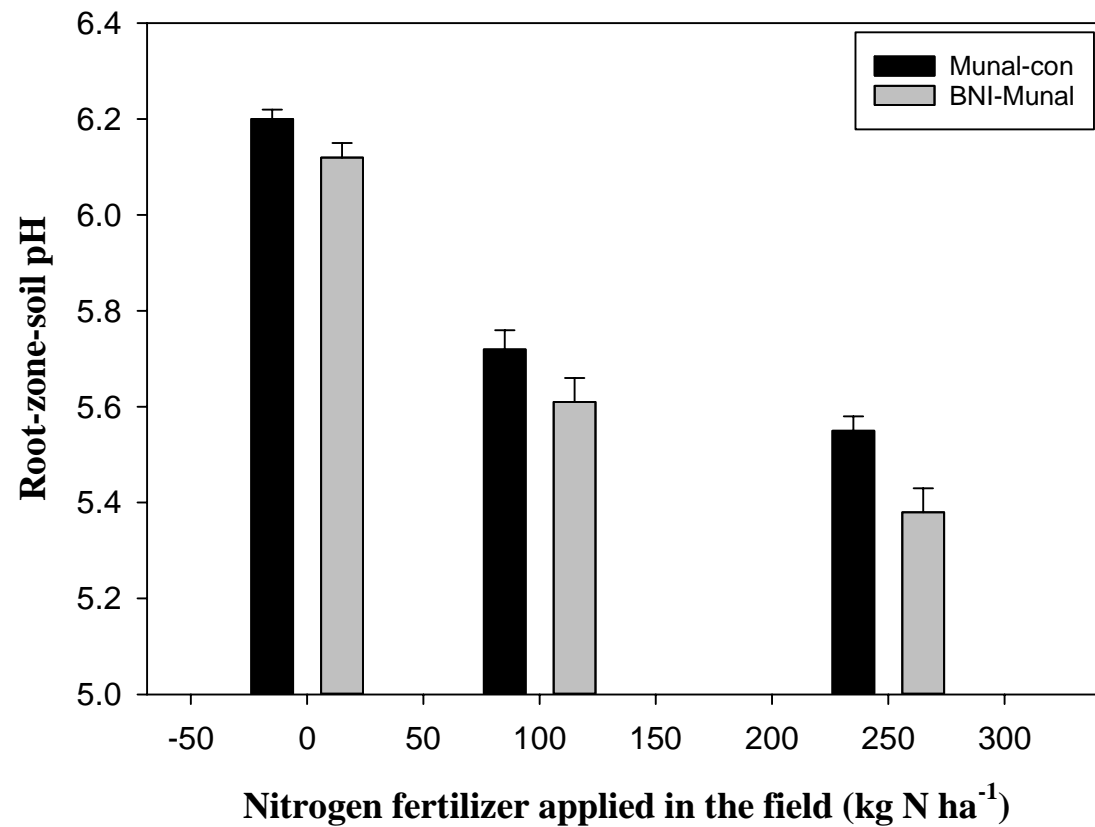

**Fig. S7d. pH of the root-zone-soil of BNI-isogenic lines ‘MUNAL-control and ‘BNI-MUNAL’ (Field study-6a).** Root-zone-soil samples are taken after 16<sup>th</sup> day after of 2<sup>nd</sup> split nitrogen fertilizer . Three-way ANOVA using GLM with SYSTAT 14.0; SE of LS Mean (Genetic stock) 0.0139 ( $P < 0.001$ ); SE of LS Mean (N-Tr) = 0.017 ( $P < 0.001$ ) (Values are means  $\pm$  SE from four replications).



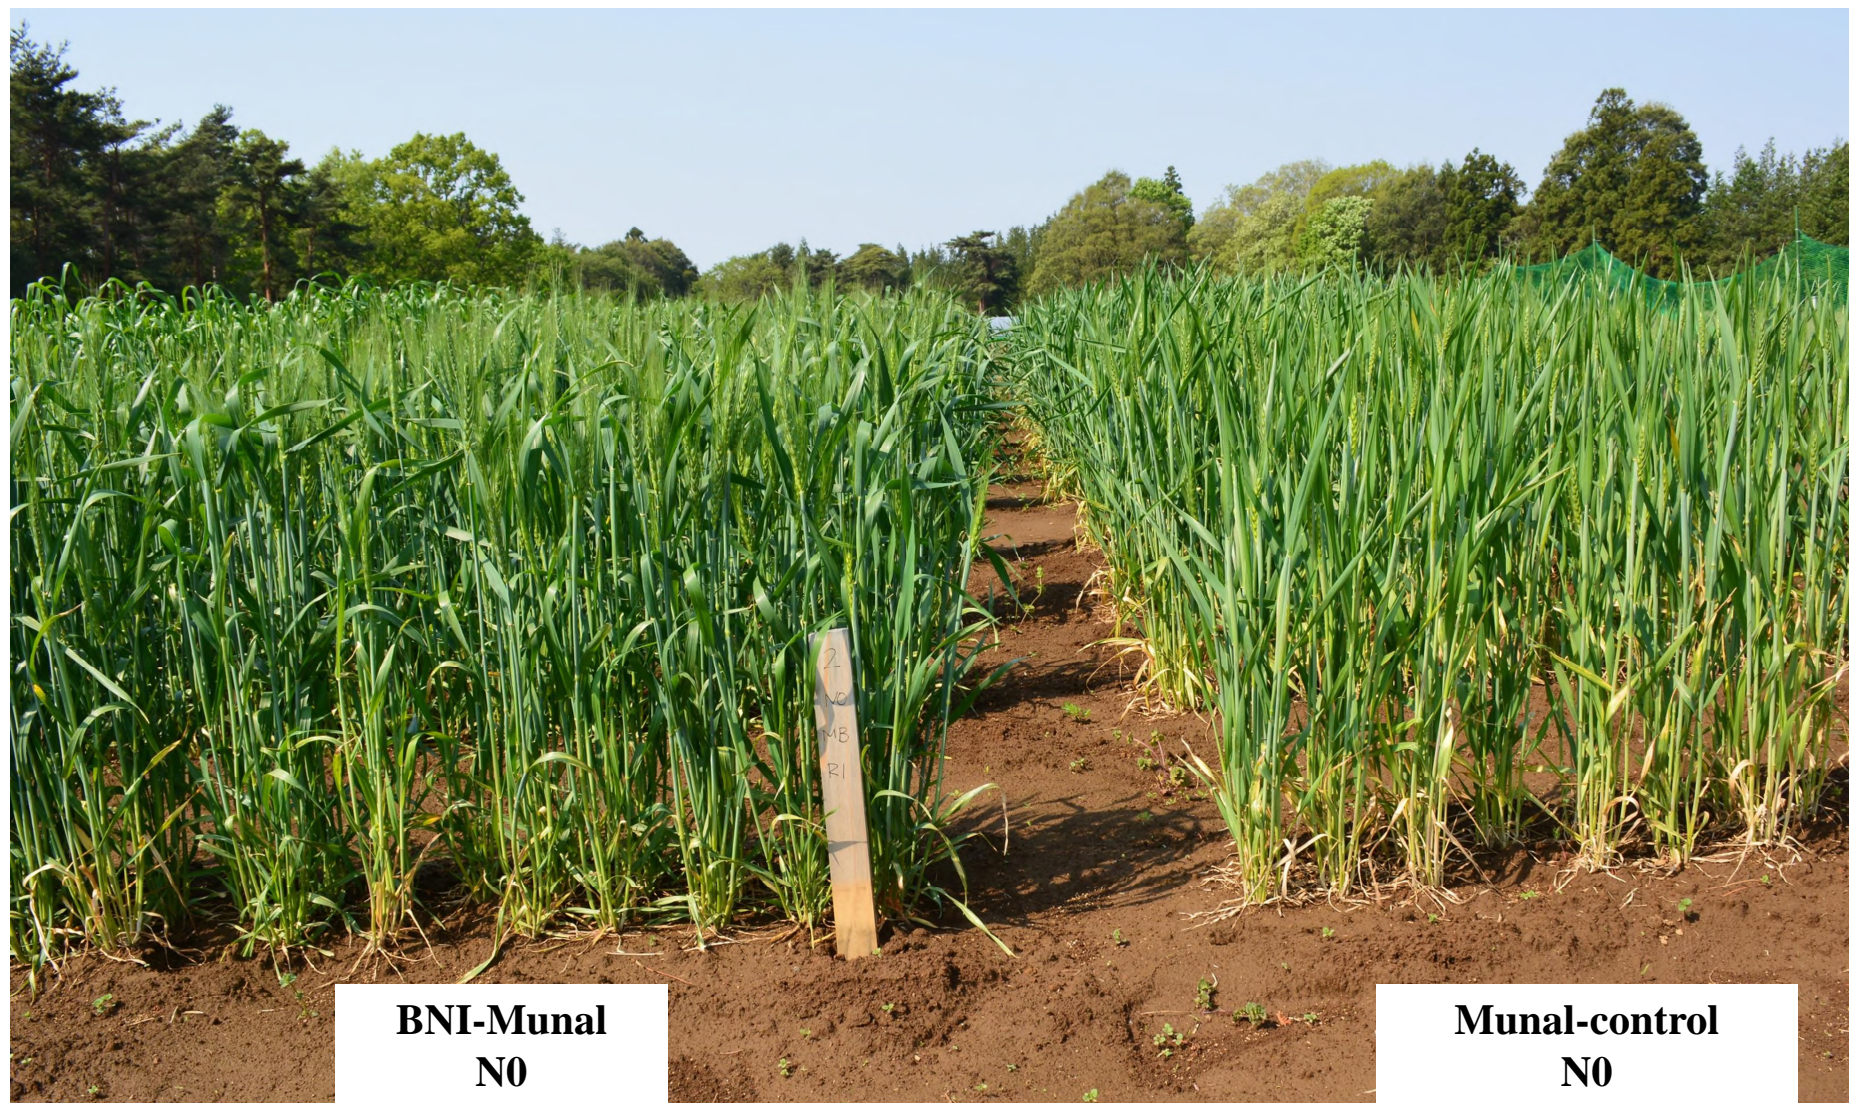

**Fig. S8a. ‘BNI-MUNAL’ (i.e. ‘MUNAL’ carrying BNI-trait, Lr#n-SA) and ‘MUNAL-control’ (BNI-Isogenic lines; Field study-6a) at heading stage under N0 treatment in the Hachimantai JIRCAS field, Tsukuba, Japan.** Mineralized soil-nitrogen levels are about 5.0 ppm at the time of planting. Nitrogen deficiency symptoms (i.e. pale-yellow leaves) have appeared in ‘MUNAL-control’, but not in ‘BNI-MUNAL’, which remained healthy green till physiological maturity.



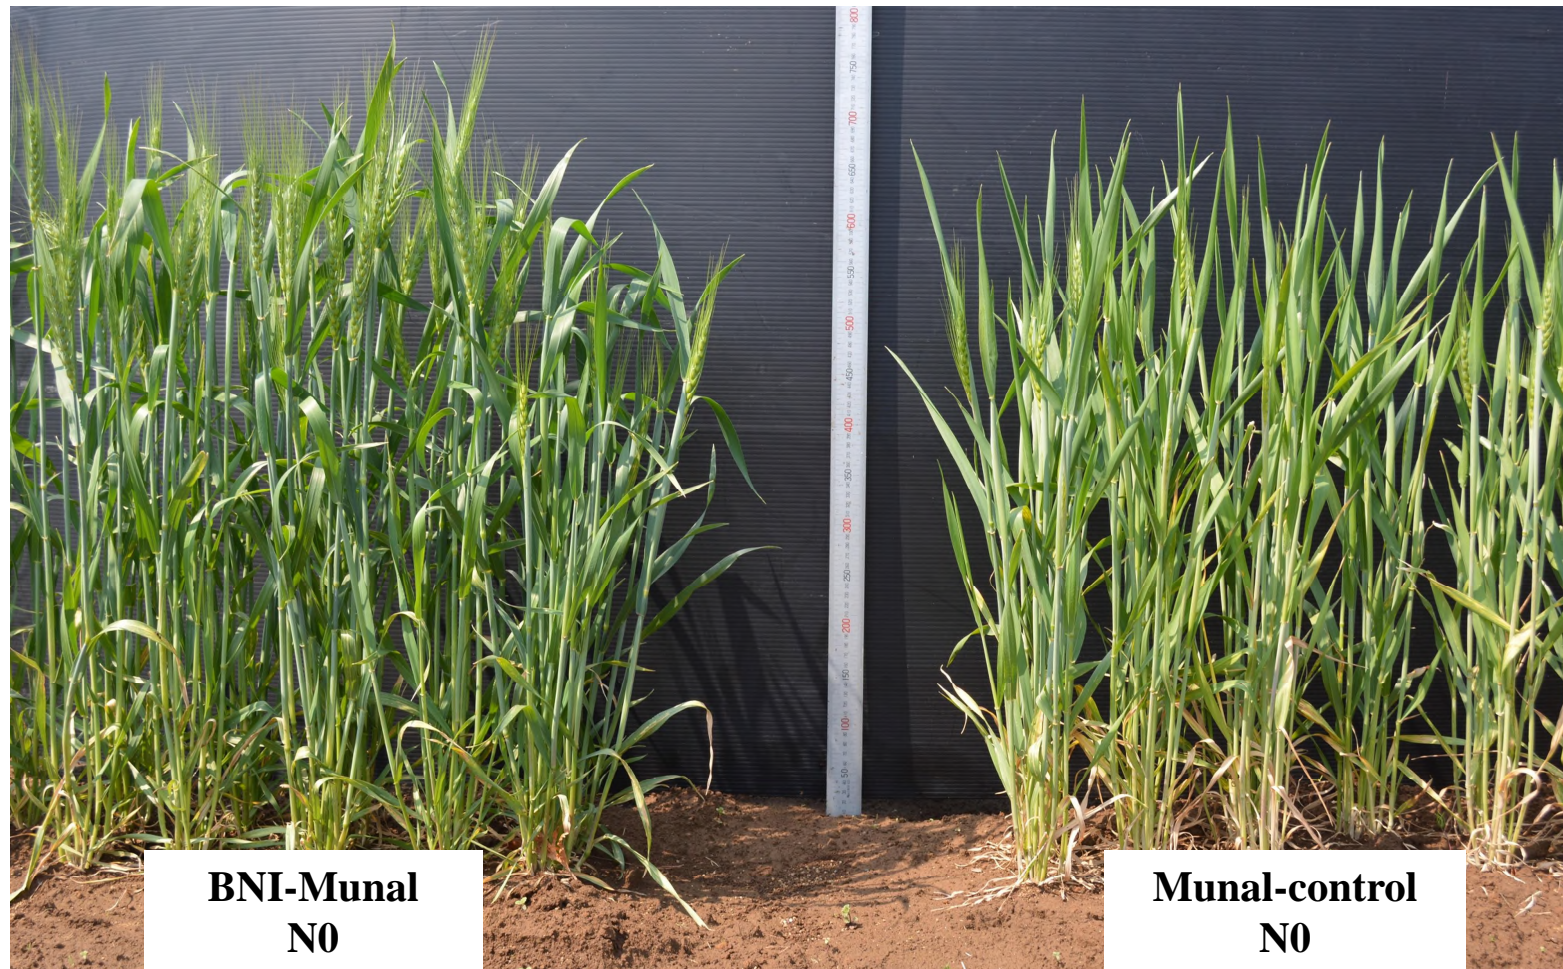

**Fig. S8b. ‘BNI-MUNAL’ (i.e. MUNAL cv carrying BNI-trait, Lr#n-SA) and ‘MUNAL-control’ (BNI-Isogenic lines; Field study-6a) at heading stage under N0 treatment in the Hachimantai JIRCAS field, Tsukuba, Japan.** Mineralized soil-nitrogen levels are about 5.0 ppm at the time of planting. Nitrogen deficiency symptoms (i.e. pale-yellow leaves) have appeared in ‘MUNAL-control’, but not in ‘BNI-MUNAL’, which remained healthy green till physiological maturity. Black sheet was placed behind to have a good contrast to see visually the nitrogen deficiency symptoms in ‘MUNAL-control’ for the photograph purpose.

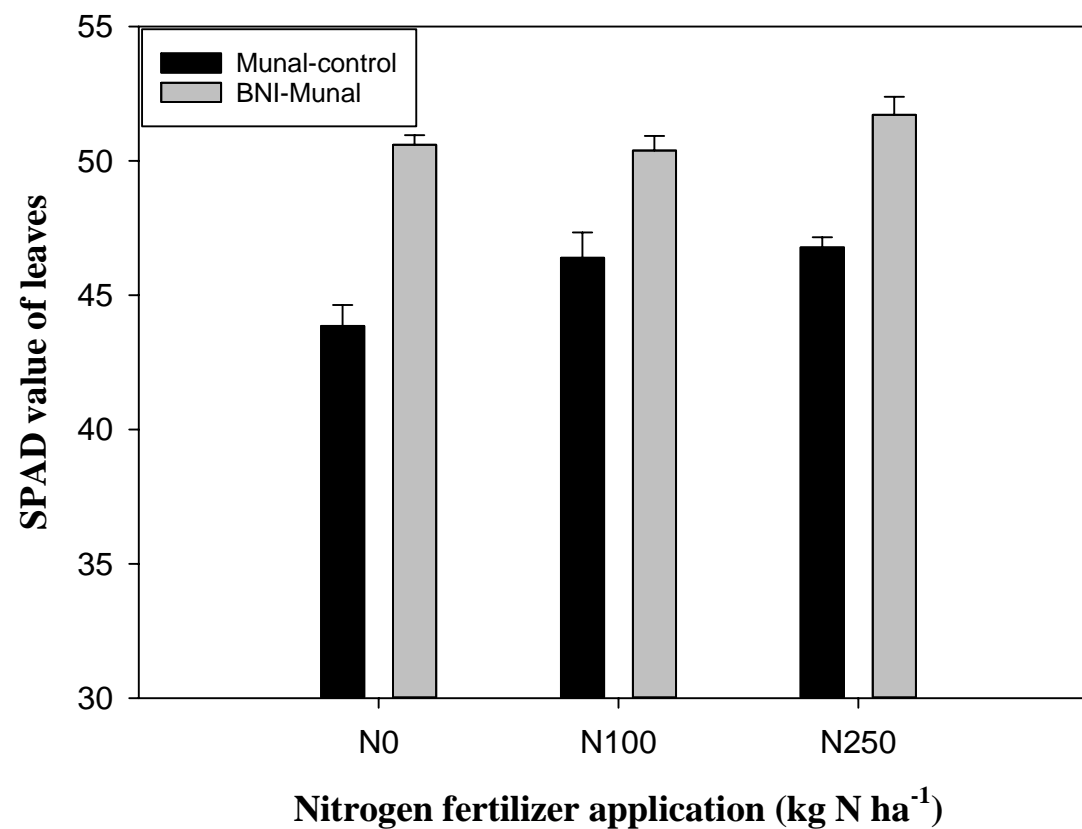

**Fig. S8c.** SPAD values (an indication for chlorophyll levels in leaves) measured for field grown wheat genetic stocks ‘MUNAL-control’ and ‘BNI-MUNAL’ (BNI-Isogenic lines; Field study-6a). SPAD measurements taken 7d after 3<sup>rd</sup> split nitrogen fertilizer application. Wheat plants were at heading stage at the time of measurements Three-way ANOVA using GLM with SYSTAT 14.0; SE of LS Mean (Genetic stock) 0.42 ( $P < 0.001$ ); SE of LS Mean (N-Tr) 0.51 ( $P < 0.05$ ) (Values are means  $\pm$  SE from four replications).



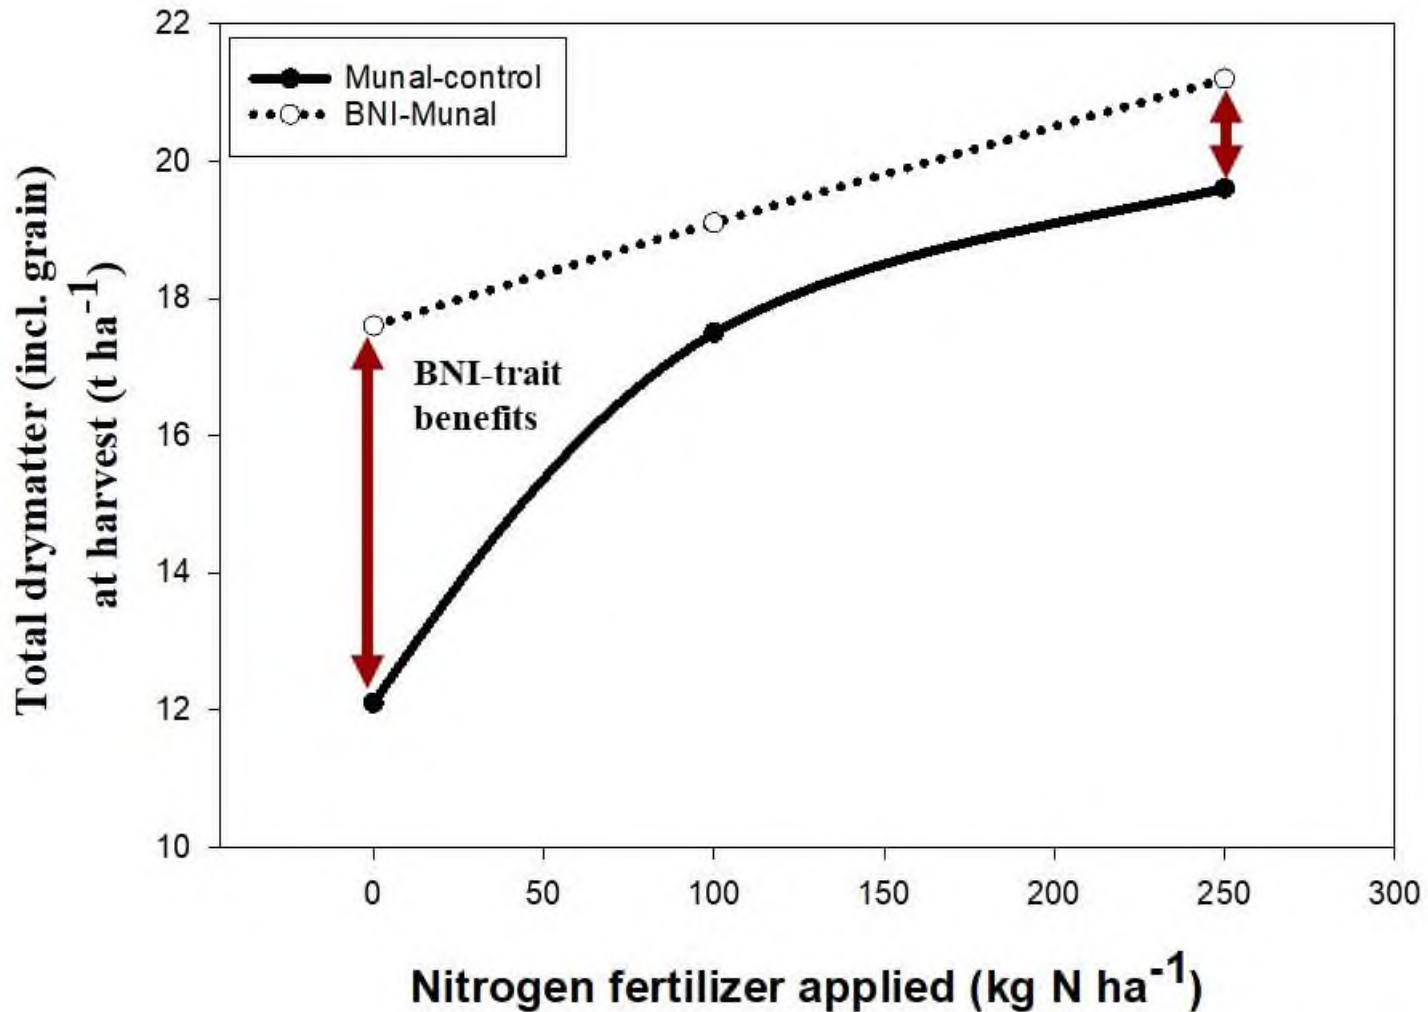

**Fig. S8d.** Total dry matter produced (including grain) in wheat genetic stocks ‘MUNAL-control’ vs. ‘BNI-Munal’ (BNI-Isogenic lines; Field study-6a) under various nitrogen fertilizer treatments. Detailed statistical analysis on results on total dry matter produced, agronomic traits and yield components are presented in Table S7.

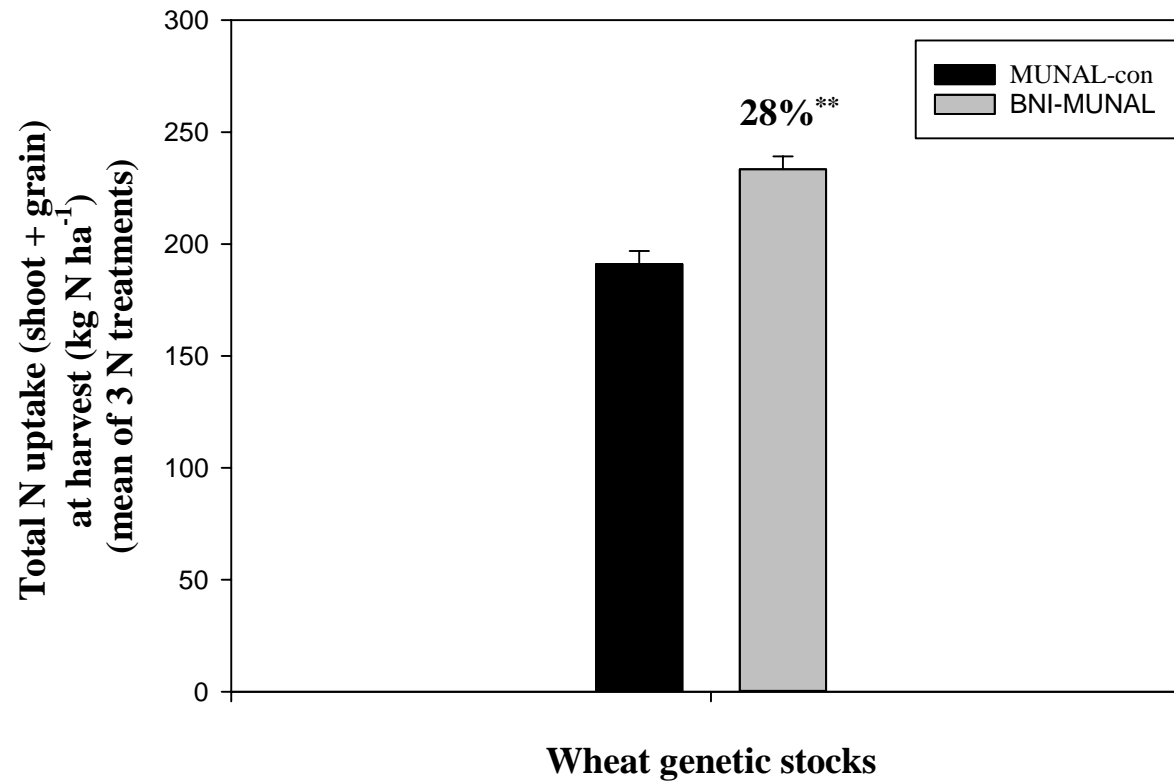

**Fig. S9a . Total N uptake at harvest (above ground dry matter that include both shoot and grain; mean of all three N-treatments for wheat genetic stocks ‘MUNAL-control’ vs. ‘BNI-MUNAL’) (BNI-Isogenic lines; Field study-6a).** Three-way ANOVA using GLM with SYSTAT 14.0; SE of LS Mean (Genetic stock) 5.79 ( $P < 0.001$ ); (Values are means  $\pm$  SE from four replications)

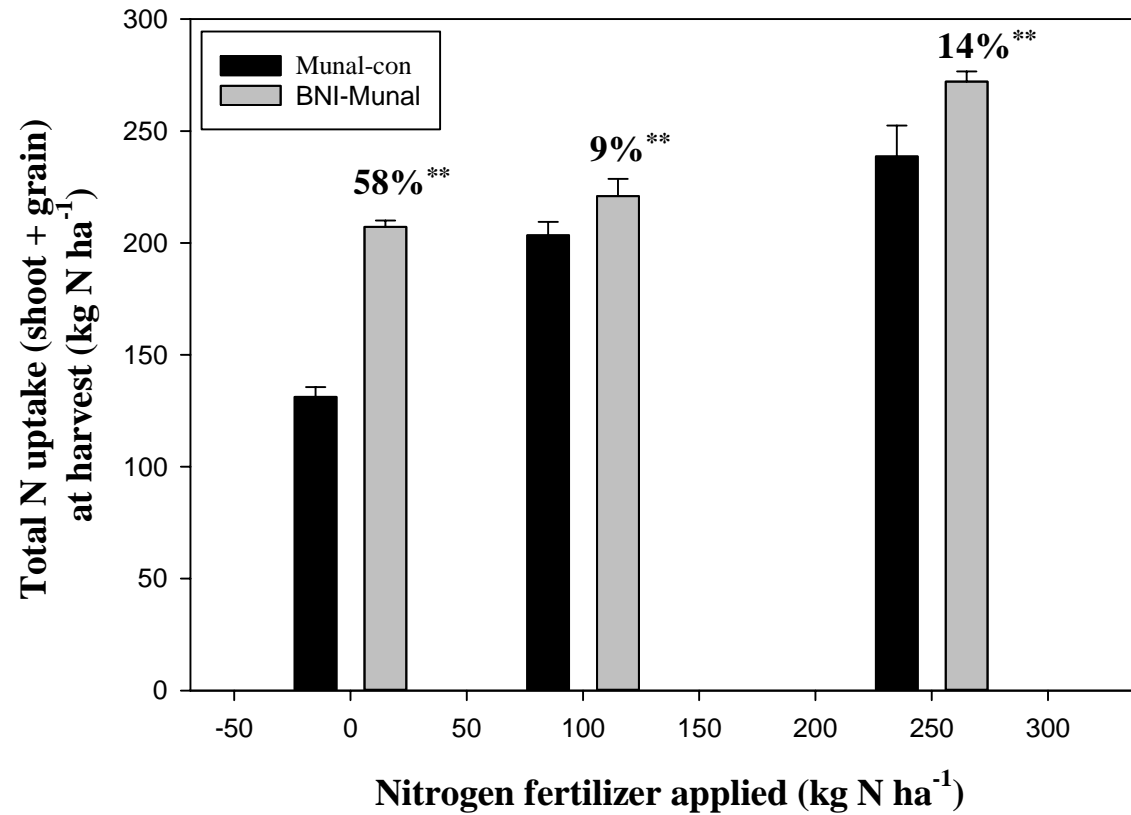

**Fig. S9b . Total N uptake at harvest (above ground dry matter that include both shoot and grain) in wheat genetic stocks ‘MUNAL-control’ vs. ‘BNI-MUNAL’ (BNI-Isogenic lines; Field study-6a).** Three-way ANOVA using GLM with SYSTAT 14.0; SE of LS Mean (Genetic stock) 5.79 ( $P < 0.001$ ); SE of LS Mean (N-Tr) 7.10 ( $P < 0.001$ ) (Values are means  $\pm$  SE from four replications).

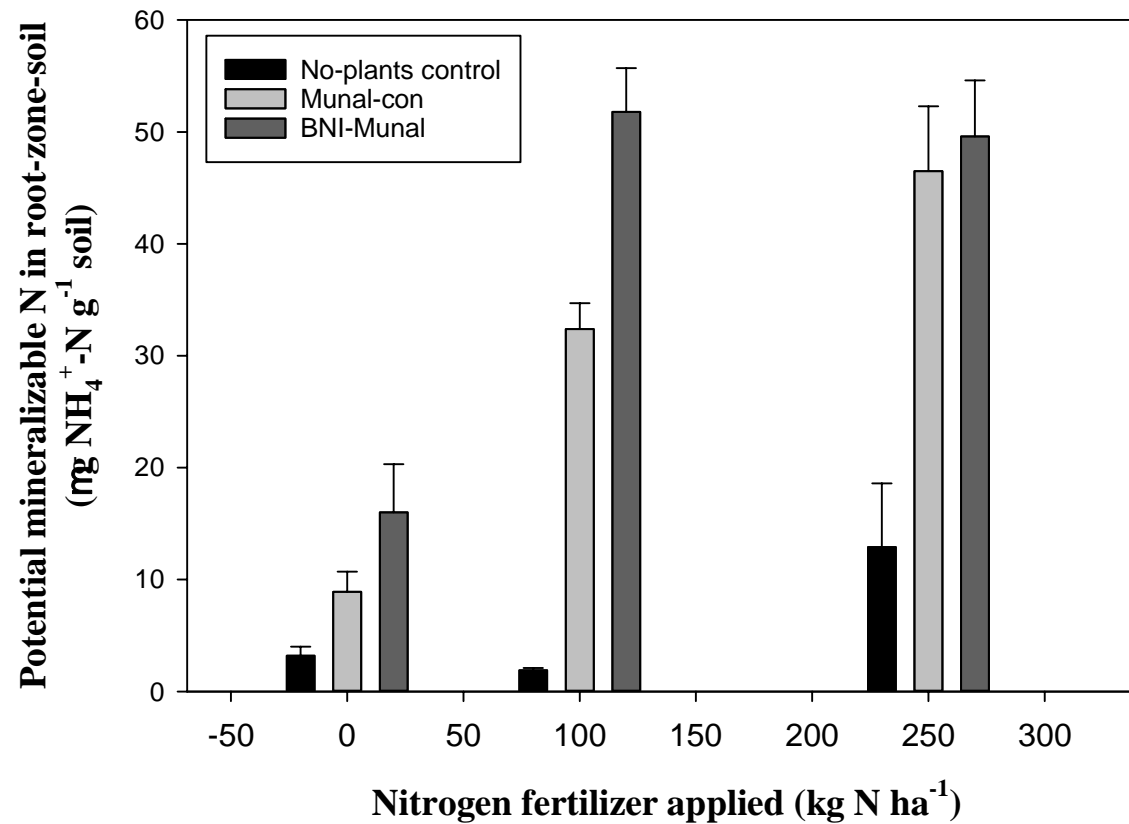

**Fig. S9c. Potential mineralizable N in root-zone-soils (after 7d incubation period) of MUNAL-control and BNI-MUNAL (BNI-Isogenic lines; Field study-6a).** The results suggest that BNI-MUNAL has a stronger influence on SOM mineralization compared to MUNAL-control. Root-zone-soil samples were taken on 16<sup>th</sup> day after 2<sup>nd</sup> split Nitrogen fertilizer application to each experimental plot in the field. Three-way ANOVA using GLM with SYSTAT 14.0; SE of LS Mean (Genetic stock) 3.18 ( $P < 0.05$ ); SE of LS Mean (N-Tr) 3.89 ( $P < 0.001$ ) (Values are means  $\pm$  SE of four replications).

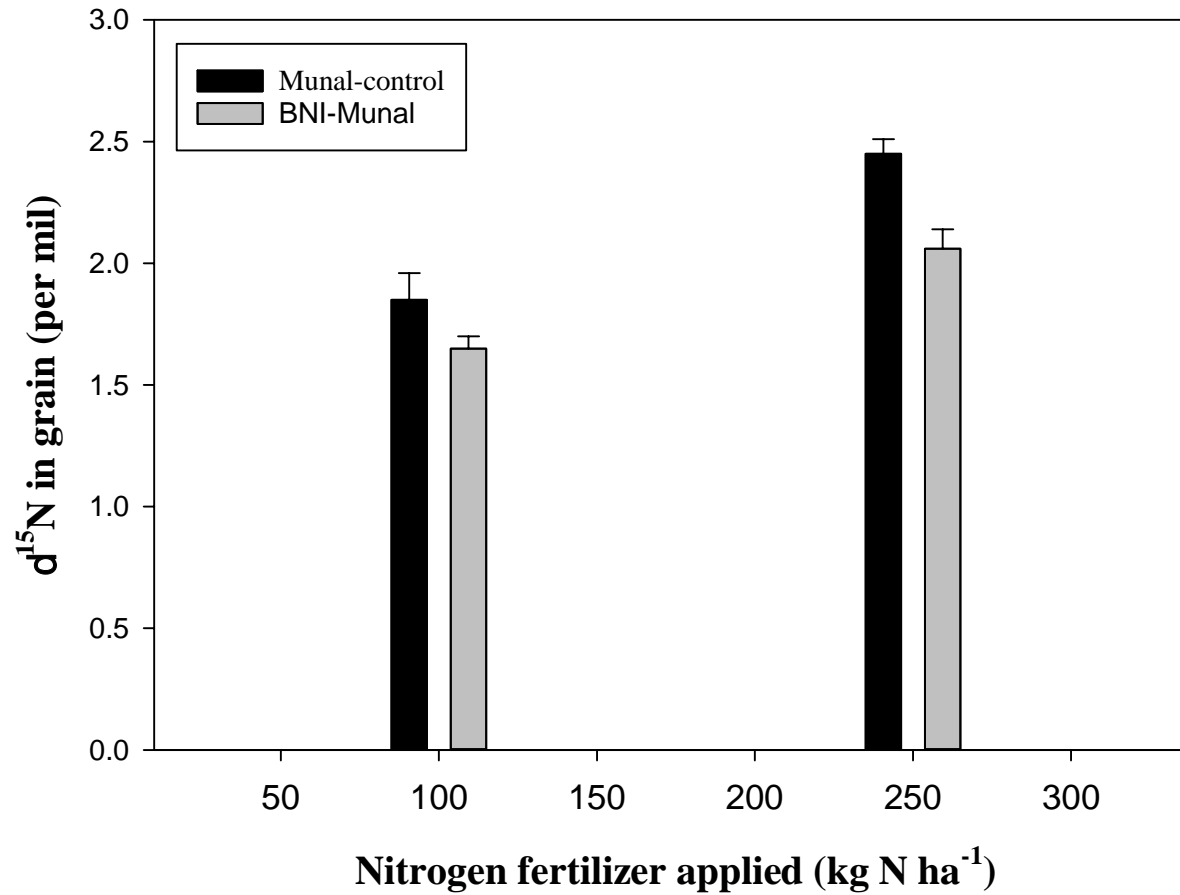

**Fig. S9d . Grain d<sup>15</sup>N levels in ‘MUNAL-control’ vs ‘BNI-MUNAL’ (BNI-Isogenic lines; Field study-6a).** A lower grain d<sup>15</sup>N in ‘BNI-MUNAL’ is an indication for higher NH<sub>4</sub><sup>+</sup> assimilation compared to ‘MUNAL-control’ during the growth period Three-way ANOVA using GLM with SYSTAT 14.0; SE of LS Mean (Genetic stock) 0.05 ( $P < 0.002$ ); SE of LS Mean (N-Tr) 0.05 ( $P < 0.001$ ) (Values are means  $\pm$  SE of four replications). About 16% lower d<sup>15</sup>N in grain suggests the possibility of 16% more ammonium uptake and assimilation in BNI-MUNAL compared to MUNAL-control with 250 kg N ha<sup>-1</sup> field plots.

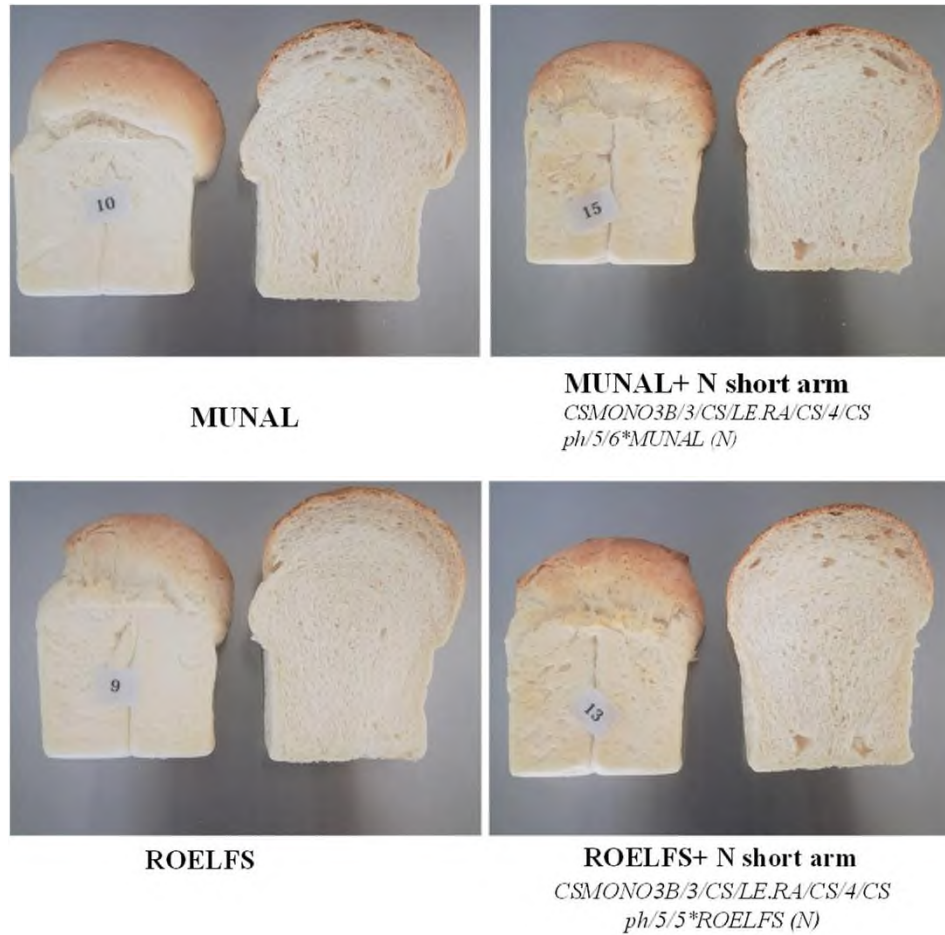

**Fig. S10. Bread characteristics of ‘MUNAL-control vs. BNI-MUNAL; ROELFS-control vs BNI-ROELFS (BNI-Isogenic lines; grain used for bread making testing came from field studies in Mexico Study 6c and 6d).**

Table S1. BNI-capacity of CIMMYT-derived wheat varieties released from 1950 to 2010 period (Study-1). Data is subjected to GLM ANOVA using SYSTAT 14.0 (*Values are means  $\pm$  SE of four replications*).

| Serial no. | Wheat variety         | BNI activity released from roots<br>(ATU g <sup>-1</sup> root dry wt. d <sup>-1</sup> ) |             |
|------------|-----------------------|-----------------------------------------------------------------------------------------|-------------|
|            |                       | Mean                                                                                    | SE          |
| 1          | Yaqui 50              | 54.0                                                                                    | 3.8         |
| 2          | Penjamo 62            | 33.2                                                                                    | 10.2        |
| <b>3</b>   | <b>Sonora 64</b>      | <b>89.1</b>                                                                             | <b>10.3</b> |
| 4          | Inia F 66             | 56.2                                                                                    | 11.0        |
| 5          | Siete Cerros T 66     | 63.7                                                                                    | 8.1         |
| 6          | Jupateco F 73         | 51.8                                                                                    | 9.1         |
| 7          | Pavon F 76            | 8.3                                                                                     | 3.7         |
| 8          | Genaro T 81           | 24.6                                                                                    | 11.4        |
| 9          | Seri M 82             | 18.1                                                                                    | 7.4         |
| 10         | Bacanora T 88         | 40.0                                                                                    | 14.4        |
| 11         | Rayon F 89            | 27.1                                                                                    | 10.7        |
| 12         | Baviacora M 92        | 23.4                                                                                    | 15.6        |
| 13         | Villa Juarez F 2009   | 61.7                                                                                    | 8.7         |
| <b>14</b>  | <b>Roelfs F 2007</b>  | <b>88.8</b>                                                                             | <b>9.2</b>  |
| 15         | Borlaug M 95          | 59.4                                                                                    | 13.7        |
| 16         | Tacupeto F 2001       | 44.6                                                                                    | 12.4        |
| 17         | Kronstad F 2004       | 65.8                                                                                    | 4.8         |
| 18         | Navojoa M 2007        | 77.4                                                                                    | 4.8         |
| 19         | Norin 10              | 42.9                                                                                    | 9.9         |
| <b>20</b>  | <b>Chinese Spring</b> | <b>72.3</b>                                                                             | <b>7.7</b>  |
|            |                       |                                                                                         |             |
|            | <i>SEM</i>            | 8.8**                                                                                   |             |

**Table S2a. The list of wild species and wheat-wild species complete or partial amphiploid lines used in this study.**

| Serial No. | Line                             | Wheat parent                  | Genome | Alien parent                                    | Genome                                                                                                    | Accession number of alien plant | Number of chromosomes |
|------------|----------------------------------|-------------------------------|--------|-------------------------------------------------|-----------------------------------------------------------------------------------------------------------|---------------------------------|-----------------------|
| 1          | <i>Leymus racemosus</i>          |                               |        |                                                 | NsNsXmXm or Ns <sup>1</sup> Ns <sup>1</sup> Ns <sup>2</sup> Ns <sup>2</sup>                               | MK0001                          | 2n = 28               |
| 2          | <i>T. tur/E.mollis</i>           | <i>Triticum turgidum</i>      | AABB   | <i>Leymus mollis</i>                            | NsNsXmXm or Ns <sup>1</sup> Ns <sup>1</sup> Ns <sup>2</sup> Ns <sup>2</sup>                               | Unknown <sup>*2</sup>           | 2n = 40               |
| 3          | DVERD-S/PS.JU//68112/WARD        | <i>T. turgidum ssp. durum</i> | AABB   | <i>Psathyrostachys juncea</i>                   | NsNs                                                                                                      | PI531828                        | 2n = 42               |
| 4          | CS/TH.BESSRABICUM                | <i>T. aestivum</i>            | AABBDD | <i>Thinopyrum bessarabicum</i>                  | JJ                                                                                                        |                                 | 2n = 56               |
| 5          | CS/TH.BESSRABICUM <sup>*1</sup>  | <i>T. aestivum</i>            | AABBDD | <i>Thinopyrum bessarabicum</i>                  | JJ                                                                                                        | PI531712                        | 2n = 56               |
| 6          | CS/TH.ELONGATUM                  | <i>T. aestivum</i>            | AABBDD | <i>Thinopyrum elongatum</i>                     | EE                                                                                                        | CS-5-71                         | 2n = 56               |
| 7          | CS/TH.JUNCEFORME 4X              | <i>T. aestivum</i>            | AABBDD | <i>Thinopyrum junceiforme</i>                   | J <sup>b</sup> J <sup>b</sup> J <sup>e</sup> J <sup>e</sup>                                               | PI414667                        | 2n = 52               |
| 8          | CS/TH.SCIRPEUM <sup>*1</sup>     | <i>T. aestivum</i>            | AABBDD | <i>Thinopyrum scirpeum</i>                      | J <sup>e</sup> J <sup>e</sup> J <sup>e</sup> J <sup>e</sup>                                               | CS-5-51                         | 2n = 58               |
| 9          | CS/TH.INTERMEDIUM <sup>*1</sup>  | <i>T. aestivum</i>            | AABBDD | <i>Thinopyrum intermedium</i>                   | StStJ <sup>e</sup> J <sup>e</sup> VV or StStJ <sup>r</sup> J <sup>r</sup> J <sup>vs</sup> J <sup>vs</sup> | RS-10-31                        | 2n = 74               |
| 10         | CS/TH.TRICHOPHORUM <sup>*1</sup> | <i>T. aestivum</i>            | AABBDD | <i>Thinopyrum intermedium ssp. trichophorum</i> | StStJJVV                                                                                                  | RS-6-a                          | 2n = 62               |

Note: All amphiploid lines were developed in CIMMYT from 1980-2000 with help of Dr. Sears

\*1 = obtained from dr. Merker Arnulf (Swedish University of Agricultural Sciences) in 1980's United States Department of Agriculture (USDA)



**Table S2b. The list of wild species and wheat-wild species complete or partial amphiploid lines used in this study.**

| <b>Serial no.</b> | <b>Line</b>                                    | <b>Wheat parent (genome)</b>                             | <b>Alien parent</b>           | <b>KSU code name</b> | <b>Seed source</b> |
|-------------------|------------------------------------------------|----------------------------------------------------------|-------------------------------|----------------------|--------------------|
| 11                | CS/A. elongatum                                | <i>T. aestivum</i>                                       | <i>Agropyron elongatum</i>    | TA3425               | KSU, USA           |
| 12                | Vilmorin27/A.intermedium                       | <i>T. aestivum</i>                                       | <i>Agropyron intermedium</i>  | TA3646               | KSU, USA           |
| 13                | Zhong7/A. intermedium                          | <i>T. aestivum</i>                                       | <i>Agropyron intermedium</i>  | TA8032               | KSU, USA           |
| 14                | Summer1/A. intermedium                         | <i>T. aestivum</i>                                       | <i>Agropyron intermedium</i>  | TA8036               | KSU, USA           |
| 15                | OK7211542/A.intermedium                        | <i>T. aestivum</i>                                       | <i>Agropyron intermedium</i>  | TA8038               | KSU, USA           |
| 16                | CS/A. scirpeum                                 | <i>T. aestivum</i>                                       | <i>Agropyron scirpeum</i>     | TA3426               | KSU, USA           |
| 17                | T.timopheevii subsp.<br>Timopheevii/C.bogdanii | <i>Triticum timopheevii</i> subsp.<br><i>Timopheevii</i> | <i>Critesion bogdanii</i>     | TA3412               | KSU, USA           |
| 18                | CS/C. californicum                             | <i>T. aestivum</i>                                       | <i>Critesion californicum</i> | TA3443               | KSU, USA           |
| 19                | Inayamakomugi/E.ciliaris                       | <i>T. aestivum</i>                                       | <i>Elymus ciliaris</i>        | TA3427               | KSU, USA           |
| 20                | T. aestivum/A.distichum                        | <i>T. aestivum</i>                                       | <i>Agropyron distichum</i>    | TA3409               | KSU, USA           |

Table S2c. BNI-capacity of amphiploid genetic stocks of wild-wheat species and wild-grasses (**Study-2b**). (Values are means  $\pm$  SE from of replications).

| Serial No. | Amphiploid genetic stock                                                 | BNI activity released from roots<br>(ATU g <sup>-1</sup> root dry wt. d <sup>-1</sup> ) |             |
|------------|--------------------------------------------------------------------------|-----------------------------------------------------------------------------------------|-------------|
|            |                                                                          | Mean                                                                                    | SE          |
| 1          | <i>Psathyrostachys juncea</i>                                            | 63.1                                                                                    | 17.9        |
| 2          | <i>Thinopyrum bessarabicum-1</i>                                         | 0.4                                                                                     | 8.2         |
| 3          | <i>Th. bessarabicum-2</i>                                                | 44.3                                                                                    | 13.3        |
| 4          | <i>Th. elongatum</i>                                                     | 95.8                                                                                    | 16.9        |
| 5          | <i>Th. junceiforme</i>                                                   | 20.6                                                                                    | 5.6         |
| 6          | <i>Th. scirpeum</i>                                                      | 24.8                                                                                    | 12.1        |
| 7          | <i>Th. intermedium</i>                                                   | Negative activity                                                                       |             |
| 8          | <i>Th. trichophorum</i>                                                  | Negative activity                                                                       |             |
| 9          | <i>Agropyron elongatum</i> (TA3425)                                      | Negative activity                                                                       |             |
| 10         | <i>A. intermedium</i> (TA3646)                                           | Negative activity                                                                       |             |
| 11         | <i>A. intermedium</i> (TA8032)                                           | Negative activity                                                                       |             |
| 12         | <i>A. intermedium</i> (TA8036)                                           | Negative activity                                                                       |             |
| 13         | <i>A. intermedium</i> (TA8038)                                           | Negative activity                                                                       |             |
| 14         | <i>A. scipeum</i> (TA3426)                                               | Negative activity                                                                       |             |
| 15         | <i>B. bogdanii</i> (TA3412)                                              | Negative activity                                                                       |             |
| 16         | <i>Critesion californicum</i> (TA3443)                                   | Negative activity                                                                       |             |
| 17         | <i>Elymus ciliaris</i> (TA3427)                                          | Negative activity                                                                       |             |
| 18         | <i>A. Distichum</i> (TA3409)                                             | Negative activity                                                                       |             |
| <b>19</b>  | <b><i>Leymus mollis</i></b><br>( <i>T. turgidum</i> x <i>L. mollis</i> ) | <b>643.9</b>                                                                            | <b>89.7</b> |
| <b>20</b>  | <b>Chinese Spring</b>                                                    | <b>72.8</b>                                                                             | <b>15.0</b> |

Note: Lines #1-6 are corresponding to #3-10 in Table S2a, and line #19 is to #2.

**Table S2d. The list of bread wheat and alien chromosome addition/translocation lines used in this study**

| Serial No.                 | Variety/Genetic stock         | Pedigree                                       | Reference web-site for pedigree or description                                                          |
|----------------------------|-------------------------------|------------------------------------------------|---------------------------------------------------------------------------------------------------------|
| 1                          | MUNAL-1 (= SUPER-172)         | WAXWING*2/KIRITATI                             | <a href="http://wheatpedigree.net/sort/show/92566">http://wheatpedigree.net/sort/show/92566</a>         |
| 2                          | ROELFS-F-2007                 | KAMBARA-1*2/KUKUNA                             | <a href="http://wheatpedigree.net/sort/show/110286">http://wheatpedigree.net/sort/show/110286</a>       |
| 3                          | QUAIU-1                       | BABAX/Lr42//BABAX*2/VIVITSI                    | <a href="http://wheatpedigree.net/sort/show/107504">http://wheatpedigree.net/sort/show/107504</a>       |
| 4                          | VOROBAY                       | CROC-1/AE.SQUARROSA (224)//OPATA-M-85/3/PASTOR | <a href="http://wheatpedigree.net/sort/show/96759">http://wheatpedigree.net/sort/show/96759</a>         |
| 5                          | NAVOJOA-M-2007                | ATTILA/PASTOR                                  | <a href="http://wheatpedigree.net/sort/show/110285">http://wheatpedigree.net/sort/show/110285</a>       |
| 6                          | BORLAUG-100 (REEDLING-1)      |                                                | <a href="http://wheatpedigree.net/sort/show/116519">http://wheatpedigree.net/sort/show/116519</a>       |
| 7                          | SONORA-64                     | YAKTANA-54//NORIN-10/BREVOR/3/2*YAQUI-54       | <a href="http://wheatpedigree.net/sort/show/58265">http://wheatpedigree.net/sort/show/58265</a>         |
| 8                          | Lr#n                          | CS*2/LE.RA                                     | <i>Leymus racemosus</i> N chromosome (Lr#n = 3Ns <sup>b</sup> ) disomic addition line                   |
| 9                          | Lr#n-SA                       | CSMONO3B/3/CS*2/LE.RA                          | Centromeric translocation of Lr#n short arm with wheat 3B chromosome long arm (T3BL.3Ns <sup>b</sup> S) |
| 10                         | Lr#n-SA-7B                    | CSMONO7B/3/CS*2/LE.RA                          | Centromeric translocation of Lr#n short arm with wheat 7B chromosome long arm (T7BL.3Ns <sup>b</sup> S) |
| 11                         | Lr#n-LA                       | CSMONO3B/3/CS*2/LE.RA                          | Centromeric translocation of Lr#n long arm with wheat 3B chromosome short arm (T3SL.3Ns <sup>b</sup> L) |
| 12                         | Tr#3                          | CS MONO 3B/3/CS/LE.RA//CS                      | Recombinant of Lr#n                                                                                     |
| 13                         | Tr#4                          | CS MONO 3B/3/CS/LE.RA//CS/4/CS ph (N)          | Recombinant of Lr#n                                                                                     |
| 14                         | Tr#7                          | CS MONO 3B/3/CS/LE.RA//CS/4/CS ph (N)          | Recombinant of Lr#n                                                                                     |
| 15                         | BNI-MUNAL                     | CSMONO3B/3/CS/LE.RA//CS/4/CS ph/5/6*MUNAL (N)  | Lr#n-SA in MUNAL background (BC <sub>5</sub> F <sub>4</sub> )                                           |
| 16                         | BNI-ROELFS                    | CSMONO3B/3/CS*2/LE.RA/3/CS ph/4/5*ROELFS (N)   | Lr#n-SA in ROELFS background (BC <sub>4</sub> F <sub>4</sub> )                                          |
| 17                         | BNI-ROELFS (BC <sub>6</sub> ) | CSMONO3B/3/CS*2/LE.RA/3/CS ph/4/7*ROELFS (N)   | Lr#n-SA in ROELFS background (BC <sub>6</sub> F <sub>3</sub> )                                          |
| 18                         | BNI-QUAIU                     | CSMONO3B/3/CS/LE.RA//CS/4/5*QUAIU(N)           | Lr#n-SA in QUAIU background (BC <sub>4</sub> F <sub>4</sub> )                                           |
| 19                         | BNI-VOROBAY                   | CSMONO3B/3/CS/LE.RA//CS/4/5*VOROBAY(N)         | Lr#n-SA in VOROBAY background (BC <sub>4</sub> F <sub>4</sub> )                                         |
| 20                         | BNI-NAVOJOA                   | CSMONO3B/3/CS/LE.RA//CS/4/5*NAVOJOA(N)         | Lr#n-SA in NAVOJOA background (BC <sub>4</sub> F <sub>4</sub> )                                         |
| BC = back cross generation |                               |                                                |                                                                                                         |

Table S3. Yield performance of five CIMMYT wheat lines across global locations

| International nursery name | 31 <sup>st</sup> ESWYT                         | 28 <sup>th</sup> SAWSN | 32 <sup>nd</sup> ESWYT | 29 <sup>th</sup> SAWSN | 33 <sup>rd</sup> ESWYT | 30 <sup>th</sup> SAWSN | 34 <sup>th</sup> ESWYT | 47 <sup>th</sup> IBWSN | 48 <sup>th</sup> IBWSN | 49 <sup>th</sup> IBWSN |
|----------------------------|------------------------------------------------|------------------------|------------------------|------------------------|------------------------|------------------------|------------------------|------------------------|------------------------|------------------------|
| Established year           | <b>2010</b>                                    | <b>2010</b>            | <b>2011</b>            | <b>2011</b>            | <b>2012</b>            | <b>2012</b>            | <b>2013</b>            | <b>2014</b>            | <b>2015</b>            | <b>2016</b>            |
| Variety name               | <b>Maximum grain yield (t ha<sup>-1</sup>)</b> |                        |                        |                        |                        |                        |                        |                        |                        |                        |
| MUNAL-1 (SUPER-172)        | <b>13.6</b>                                    |                        | <b>10.7</b>            |                        | <b>8.8</b>             |                        | <b>9.5</b>             | <b>10.0</b>            | <b>10.9</b>            | <b>9.9</b>             |
| ROELFS-F-2007              |                                                |                        | <b>10.4</b>            |                        |                        |                        |                        |                        |                        |                        |
| QUAIU-1                    | <b>12.8</b>                                    |                        |                        |                        |                        |                        |                        |                        |                        | <b>10.3</b>            |
| VOROBY                     |                                                | <b>13.0</b>            |                        | <b>7.7</b>             |                        | <b>8.6</b>             |                        |                        |                        |                        |
| NAVOJOA-M-2007             |                                                |                        |                        |                        |                        |                        |                        |                        |                        |                        |

The data can be obtained from website <http://orderseed.cimmyt.org/iwin/iwin-results-1.php>.

*ESWYT* – Elite Spring Wheat Yield Trial; *IBWSN* – International Spring Bread Wheat Screening Nursery

*SAWSN* – Semi-arid Wheat Screening Nursery. *MUNAL-1* has been released in India as *SUPER-172*

Table S4a. Soil-nitrate levels and soil-ammonium levels in core-soil samples taken (at 20 cm depth) near the plants of seedbeds in field-plots of BNI-isogenic lines, MUNAL-control and BNI-MUNAL (**Field Study-6a**). Three-way ANOVA using GLM with SYSTAT 14.0 (*Values are means  $\pm$  SE of four replications*)

| Nitrogen application<br>(kg N ha <sup>-1</sup> )     | Soil nitrate (mg NO <sub>3</sub> <sup>-</sup> kg <sup>-1</sup> soil)  |      |             |      |
|------------------------------------------------------|-----------------------------------------------------------------------|------|-------------|------|
|                                                      | 1 <sup>st</sup> sampling                                              |      |             |      |
|                                                      | Wheat genetic stocks                                                  |      |             |      |
|                                                      | MUNAL-control                                                         |      | BNI-MUNAL   |      |
|                                                      | Mean                                                                  | SE   | Mean        | SE   |
| <b>0</b>                                             | 1.75                                                                  | 0.25 | 2.00        | 0.41 |
| <b>100</b>                                           | 33.0                                                                  | 1.91 | 26.3        | 3.0  |
| <b>250</b>                                           | 68.3                                                                  | 4.9  | 47.4        | 6.4  |
| <b>Mean</b>                                          | <b>34.3</b>                                                           |      | <b>25.2</b> |      |
| SE of LS Mean (Genetic stock) 2.41 ( <i>P</i> <0.05) |                                                                       |      |             |      |
| SE of LS Mean (N-Tr) = 2.96 ( <i>P</i> <0.001)       |                                                                       |      |             |      |
|                                                      |                                                                       |      |             |      |
| Nitrogen application<br>(kg N ha <sup>-1</sup> )     | Soil ammonium (mg NH <sub>4</sub> <sup>+</sup> kg <sup>-1</sup> soil) |      |             |      |
|                                                      | 1 <sup>st</sup> sampling                                              |      |             |      |
|                                                      | Wheat genetic stocks                                                  |      |             |      |
|                                                      | MUNAL-control                                                         |      | BNI-MUNAL   |      |
|                                                      | Mean                                                                  | SE   | Mean        | SE   |
| <b>0</b>                                             | 1.50                                                                  | 0.29 | 3.75        | 1.03 |
| <b>100</b>                                           | 16.00                                                                 | 3.1  | 45.5        | 5.4  |
| <b>250</b>                                           | 64.3                                                                  | 6.1  | 105.3       | 12.8 |
| <b>Mean</b>                                          | <b>27.3</b>                                                           |      | <b>51.5</b> |      |
| SE of LS Mean (Genetic stock) 4.3 ( <i>P</i> <0.001) |                                                                       |      |             |      |
| SE of LS Mean (N-Tr) = 5.2 ( <i>P</i> <0.001)        |                                                                       |      |             |      |
|                                                      |                                                                       |      |             |      |
| Nitrogen application<br>(kg N ha <sup>-1</sup> )     | Soil nitrate (mg NO <sub>3</sub> <sup>-</sup> kg <sup>-1</sup> soil)  |      |             |      |
|                                                      | 2 <sup>nd</sup> Sampling                                              |      |             |      |
|                                                      | Wheat genetic stocks                                                  |      |             |      |
|                                                      | MUNAL-control                                                         |      | BNI-MUNAL   |      |
|                                                      | Mean                                                                  | SE   | Mean        | SE   |
| <b>0</b>                                             | 3.5                                                                   | 0.5  | 5.0         | 0.0  |
| <b>100</b>                                           | 66.0                                                                  | 6.5  | 59.3        | 3.5  |
| <b>250</b>                                           | 185.8                                                                 | 11.8 | 144.5       | 14.9 |
| <b>Mean</b>                                          | <b>85.2</b>                                                           |      | <b>69.6</b> |      |
| SE of LS Mean (Genetic stock) 5.1 ( <i>P</i> <0.005) |                                                                       |      |             |      |
| SE of LS Mean (N-Tr) = 6.3 ( <i>P</i> <0.001)        |                                                                       |      |             |      |
|                                                      |                                                                       |      |             |      |
| Nitrogen application<br>(kg N ha <sup>-1</sup> )     | Soil ammonium (mg NH <sub>4</sub> <sup>+</sup> kg <sup>-1</sup> soil) |      |             |      |
|                                                      | 2 <sup>nd</sup> sampling                                              |      |             |      |
|                                                      | Wheat genetic stocks                                                  |      |             |      |
|                                                      | MUNAL-control                                                         |      | BNI-MUNAL   |      |
|                                                      | Mean                                                                  | SE   | Mean        | SE   |
| <b>0</b>                                             | 5.0                                                                   | 0.4  | 5.3         | 0.5  |
| <b>100</b>                                           | 6.0                                                                   | 0.0  | 5.8         | 0.3  |
| <b>250</b>                                           | 74.0                                                                  | 7.6  | 100.3       | 8.9  |
| <b>Mean</b>                                          | <b>28.3</b>                                                           |      | <b>37.1</b> |      |
| SE of LS Mean (Genetic stock) 3.5 ( <i>P</i> <0.09)  |                                                                       |      |             |      |
| SE of LS Mean (N-Tr) = 4.2 ( <i>P</i> <0.001)        |                                                                       |      |             |      |
|                                                      |                                                                       |      |             |      |

Note: 1<sup>st</sup> sampling - soil cores are taken on 7<sup>th</sup> day after 2<sup>nd</sup> split N-application;  
2<sup>nd</sup> sampling – soil cores were taken on 7<sup>th</sup> day after 3<sup>rd</sup> split N-application.

Table S4b. Soil mineral nitrogen as ammonium (kg N-NH<sub>4</sub><sup>+</sup> ha<sup>-1</sup>) and nitrate (kg N-NO<sub>3</sub><sup>-</sup> ha<sup>-1</sup>), and the abundance of AOB and AOA *amoA* gene (copies g<sup>-1</sup> dry soil) in soil from BNI-isogenic lines, MUNAL-control and BNI-MUNAL (**Study-6b**). Wheat was fertilized with 200 kg N ha<sup>-1</sup> in form of ammonium sulphate. Time of sampling was 30 days after fertilization. The *t*-student test was used for the comparison of Munal-Control and BNI-Munal, and the significant differences at p <0.05 are marked with different letters.

|                           | Soil NH <sub>4</sub> <sup>+</sup><br>content<br>(kg NH <sub>4</sub> <sup>+</sup> -N ha <sup>-1</sup> ) | Soil NO <sub>3</sub> <sup>-</sup><br>content<br>(kg NO <sub>3</sub> <sup>-</sup> -N ha <sup>-1</sup> ) | AOB <i>amoA</i> genes<br>(copies g <sup>-1</sup> dry soil) | AOA <i>amoA</i> genes<br>(copies g <sup>-1</sup> dry soil) |
|---------------------------|--------------------------------------------------------------------------------------------------------|--------------------------------------------------------------------------------------------------------|------------------------------------------------------------|------------------------------------------------------------|
| <b>MUNAL-<br/>Control</b> | 0.31 ± 0.16 b                                                                                          | 33.78 ± 1.84 a                                                                                         | 6.04E+06 ± 9.91E+05 a                                      | 3.36E+07 ± 2.44E+06 a                                      |
| <b>BNI-<br/>MUNAL</b>     | 1.31 ± 0.29 a                                                                                          | 9.63 ± 2.34 b                                                                                          | 3.31E+06 ± 5.58E+05 b                                      | 3.32E+07 ± 3.20E+06 a                                      |

Table S5. Leaf nitrate levels in MUNAL-control vs. BNI-MUNAL (BNI-isogenic lines) in field-grown plants (Field Study-6a). Three-way ANOVA using GLM with SYSTAT 14.0 (Values are means  $\pm$  SE from four replications)

| Nitrogen application<br>(kg N ha <sup>-1</sup> )  | Leaf nitrate levels (mg NO <sub>3</sub> <sup>-</sup> kg <sup>-1</sup> FW) |      |             |      |
|---------------------------------------------------|---------------------------------------------------------------------------|------|-------------|------|
|                                                   | 1 <sup>st</sup> sampling                                                  |      |             |      |
|                                                   | Wheat genetic stocks                                                      |      |             |      |
|                                                   | MUNAL-control                                                             |      | BNI-MUNAL   |      |
|                                                   | Mean                                                                      | SE   | Mean        | SE   |
| <b>0</b>                                          | 28.3                                                                      | 1.78 | 20.2        | 3.95 |
| <b>100</b>                                        | 42.9                                                                      | 0.78 | 34.1        | 1.34 |
| <b>250</b>                                        | 57.1                                                                      | 4.4  | 37.5        | 2.7  |
| <b>Mean</b>                                       | <b>42.7</b>                                                               |      | <b>30.6</b> |      |
| SE of LS Mean (Genetic stock) 1.8 ( $P < 0.001$ ) |                                                                           |      |             |      |
| SE of LS Mean (N-Tr) = 2.2 ( $P < 0.001$ )        |                                                                           |      |             |      |
|                                                   |                                                                           |      |             |      |
| Nitrogen application<br>(kg N ha <sup>-1</sup> )  | Leaf nitrate levels (mg NO <sub>3</sub> <sup>-</sup> kg <sup>-1</sup> FW) |      |             |      |
|                                                   | 2 <sup>nd</sup> sampling                                                  |      |             |      |
|                                                   | Wheat genetic stocks                                                      |      |             |      |
|                                                   | MUNAL-control                                                             |      | BNI-MUNAL   |      |
|                                                   | Mean                                                                      | SE   | Mean        | SE   |
| <b>0</b>                                          | 11.2                                                                      | 1.34 | 11.5        | 2.2  |
| <b>100</b>                                        | 25.2                                                                      | 0.7  | 18.2        | 2.4  |
| <b>250</b>                                        | 53.8                                                                      | 3.1  | 27.9        | 2.2  |
| <b>Mean</b>                                       | <b>30.0</b>                                                               |      | <b>19.2</b> |      |
| SE of LS Mean (Genetic stock) 2.2 ( $P < 0.005$ ) |                                                                           |      |             |      |
| SE of LS Mean (N-Tr) = 2.7 ( $P < 0.001$ )        |                                                                           |      |             |      |

Note: Leaf samples are taken on 7<sup>th</sup> day after application of 2<sup>nd</sup> split nitrogen fertilizer to field plots - 1<sup>st</sup> sampling; 7<sup>th</sup> day after application of 3<sup>rd</sup> split N-fertilizer - 2<sup>nd</sup> sampling; Leaf samples are collected from 10 plants from each field plot and stored at -20C before used for leaf nitrate determination. Fresh leaf tissue samples are used for NRA and GS activities determinations.

Table S6. Nitrate reductase activity (NRA) and Glutamine Synthetase Activity (GSA) in leaves of MUNAL-control vs. BNI-MUNAL (BNI-isogenic lines) of field-grown plants (Field Study-6a).

Three-way ANOVA using GLM with SYSTAT 14.0; (Values are means  $\pm$  SE from four replications)

| Nitrogen application<br>(kg N ha <sup>-1</sup> )    | NRA in leaves (mmol NO <sub>2</sub> <sup>-</sup> g <sup>-1</sup> protein h <sup>-1</sup> ) |      |             |      |
|-----------------------------------------------------|--------------------------------------------------------------------------------------------|------|-------------|------|
|                                                     | Wheat genetic stocks                                                                       |      |             |      |
|                                                     | MUNAL-control                                                                              |      | BNI-MUNAL   |      |
|                                                     | Mean                                                                                       | SE   | Mean        | SE   |
| <b>0</b>                                            | 9.36                                                                                       | 0.42 | 7.7         | 0.17 |
| <b>100</b>                                          | 8.82                                                                                       | 0.39 | 7.05        | 0.17 |
| <b>250</b>                                          | 6.06                                                                                       | 0.17 | 5.42        | 0.11 |
| <b>Mean</b>                                         | <b>8.08</b>                                                                                |      | <b>6.72</b> |      |
| SE of LS Mean (Genetic stock) 0.171 ( $P < 0.001$ ) |                                                                                            |      |             |      |
| SE of LS Mean (N-Tr) = 0.21 ( $P < 0.001$ )         |                                                                                            |      |             |      |
|                                                     |                                                                                            |      |             |      |
| Nitrogen application<br>(kg N ha <sup>-1</sup> )    | GSA (mmol g <sup>-1</sup> protein h <sup>-1</sup> )                                        |      |             |      |
|                                                     | Wheat genetic stocks                                                                       |      |             |      |
|                                                     | MUNAL-control                                                                              |      | BNI-MUNAL   |      |
|                                                     | Mean                                                                                       | SE   | Mean        | SE   |
| <b>0</b>                                            | 8.06                                                                                       | 0.12 | 9.49        | 0.21 |
| <b>100</b>                                          | 6.67                                                                                       | 0.41 | 7.7         | 0.36 |
| <b>250</b>                                          | 6.33                                                                                       | 0.11 | 7.22        | 0.3  |
| <b>Mean</b>                                         | <b>7.02</b>                                                                                |      | <b>8.14</b> |      |
| SE of LS Mean (Genetic stock) 0.17 ( $P < 0.001$ )  |                                                                                            |      |             |      |
| SE of LS Mean (N-Tr) = 0.20 ( $P < 0.001$ )         |                                                                                            |      |             |      |
|                                                     |                                                                                            |      |             |      |

Note: Leaf samples were taken on 7<sup>th</sup> day after application of 2<sup>nd</sup> split nitrogen fertilizer to field plots (i.e. 1<sup>st</sup> sampling). Leaf samples are collected from 10 plants from each field plot and Fresh leaf tissue samples are used for NRA and GS activities determinations.



Table. S7. Total dry matter production, grain yields, Harvest index, tiller number, 100-seed weight in MUNAL-control vs. BNI-MUNAL (BNI-isogenic lines) at harvest under various N-treatments (Field Study-6a). Three-way ANOVA using GLM with SYSTAT 14.0; (Values are means  $\pm$  SE from four replications)

| Nitrogen application<br>(kg N ha <sup>-1</sup> )                                                | Total dry matter production (including grain wt.)<br>at harvest (t ha <sup>-1</sup> ) |      |             |      |
|-------------------------------------------------------------------------------------------------|---------------------------------------------------------------------------------------|------|-------------|------|
|                                                                                                 | Wheat genetic stocks                                                                  |      |             |      |
|                                                                                                 | MUNAL-control                                                                         |      | BNI-MUNAL   |      |
|                                                                                                 | Mean                                                                                  | SE   | Mean        | SE   |
| <b>0</b>                                                                                        | 12.1                                                                                  | 0.3  | 17.6        | 0.48 |
| <b>100</b>                                                                                      | 17.5                                                                                  | 0.41 | 19.1        | 0.48 |
| <b>250</b>                                                                                      | 19.6                                                                                  | 0.63 | 21.2        | 0.45 |
| <b>Mean</b>                                                                                     | <b>16.4</b>                                                                           |      | <b>19.3</b> |      |
| SE of LS Mean (Genetic stock) 0.40 ( $P<0.001$ )<br>SE of LS Mean (N-Tr) = 0.49 ( $P<0.001$ )   |                                                                                       |      |             |      |
|                                                                                                 |                                                                                       |      |             |      |
| Nitrogen application<br>(kg N ha <sup>-1</sup> )                                                | Grain Yield (t ha <sup>-1</sup> )                                                     |      |             |      |
|                                                                                                 | Wheat genetic stocks                                                                  |      |             |      |
|                                                                                                 | MUNAL-control                                                                         |      | BNI-MUNAL   |      |
|                                                                                                 | Mean                                                                                  | SE   | Mean        | SE   |
| <b>0</b>                                                                                        | 4.5                                                                                   | 0.13 | 6.8         | 0.22 |
| <b>100</b>                                                                                      | 7.0                                                                                   | 0.28 | 7.7         | 0.16 |
| <b>250</b>                                                                                      | 7.6                                                                                   | 0.34 | 8.8         | 0.3  |
| <b>Mean</b>                                                                                     | <b>6.4</b>                                                                            |      | <b>7.8</b>  |      |
| SE of LS Mean (Genetic stock) 0.164 ( $P<0.001$ )<br>SE of LS Mean (N-Tr) = 0.201 ( $P<0.001$ ) |                                                                                       |      |             |      |
|                                                                                                 |                                                                                       |      |             |      |
| Nitrogen application<br>(kg N ha <sup>-1</sup> )                                                | Harvest Index HI (%)                                                                  |      |             |      |
|                                                                                                 | Wheat genetic stocks                                                                  |      |             |      |
|                                                                                                 | MUNAL-control                                                                         |      | BNI-MUNAL   |      |
|                                                                                                 | Mean                                                                                  | SE   | Mean        | SE   |
| <b>0</b>                                                                                        | 37.1                                                                                  | 0.47 | 38.6        | 0.4  |
| <b>100</b>                                                                                      | 40.1                                                                                  | 0.87 | 40.5        | 0.21 |
| <b>250</b>                                                                                      | 38.6                                                                                  | 0.83 | 41.4        | 0.57 |
| <b>Mean</b>                                                                                     | <b>38.6</b>                                                                           |      | <b>40.2</b> |      |
| SE of LS Mean (Genetic stock) 0.32 ( $P<0.003$ )<br>SE of LS Mean (N-Tr) = 0.39 ( $P<0.001$ )   |                                                                                       |      |             |      |
|                                                                                                 |                                                                                       |      |             |      |
| Nitrogen application<br>(kg N ha <sup>-1</sup> )                                                | No. of tillers per plant                                                              |      |             |      |
|                                                                                                 | Wheat genetic stocks                                                                  |      |             |      |
|                                                                                                 | MUNAL-control                                                                         |      | BNI-MUNAL   |      |
|                                                                                                 | Mean                                                                                  | SE   | Mean        | SE   |
| <b>0</b>                                                                                        | 9.9                                                                                   | 0.39 | 12.9        | 0.38 |
| <b>100</b>                                                                                      | 13.0                                                                                  | 0.21 | 14.1        | 0.67 |
| <b>250</b>                                                                                      | 16.2                                                                                  | 0.61 | 16.9        | 0.49 |
| <b>Mean</b>                                                                                     | <b>13.0</b>                                                                           |      | <b>14.6</b> |      |
| SE of LS Mean (Genetic stock) 0.32 ( $P<0.002$ )<br>SE of LS Mean (N-Tr) = 0.39 ( $P<0.001$ )   |                                                                                       |      |             |      |
|                                                                                                 |                                                                                       |      |             |      |

| Nitrogen application<br>(kg N ha <sup>-1</sup> )    | 100 seed weight (g)         |      |            |      |
|-----------------------------------------------------|-----------------------------|------|------------|------|
|                                                     | <i>Wheat genetic stocks</i> |      |            |      |
|                                                     | MUNAL-control               |      | BNI-MUNAL  |      |
|                                                     | Mean                        | SE   | Mean       | SE   |
| <b>0</b>                                            | 4.9                         | 0.02 | 5.3        | 0.06 |
| <b>100</b>                                          | 4.8                         | 0.01 | 5.0        | 0.05 |
| <b>250</b>                                          | 4.6                         | 0.07 | 4.8        | 0.09 |
| <b>Mean</b>                                         | <b>4.8</b>                  |      | <b>5.0</b> |      |
| SE of LS Mean (Genetic stock) 0.037 ( $P < 0.001$ ) |                             |      |            |      |
| SE of LS Mean (N-Tr) = 0.046 ( $P < 0.001$ )        |                             |      |            |      |
|                                                     |                             |      |            |      |

**Table S8a. Seed protein quality of BNI-isogenic lines of ROELF-control, BNI-ROELF, MUNAL-control, BNI-MUNAL grown in two field sites in Mexico (Obregon and Elbatan) during 2019 and 2020**

| Field study  | Genetic stock                 | GPRO (%) | FPRO (%) | SDSS (mL) | LV (mL) | BCS (-)   | HMW-GS composition |               |               | LMW-GS composition |               |               |
|--------------|-------------------------------|----------|----------|-----------|---------|-----------|--------------------|---------------|---------------|--------------------|---------------|---------------|
|              |                               |          |          |           |         |           | <i>Glu-A1</i>      | <i>Glu-B1</i> | <i>Glu-D1</i> | <i>Glu-A3</i>      | <i>Glu-B3</i> | <i>Glu-D3</i> |
| ElBatan2019  | ROELF-Control                 | 13.6     | 11.9     | 20.0      | 835     | Very Good | <i>b</i>           | <i>i</i>      | <i>d</i>      | <i>b</i>           | <i>h</i>      | <i>b</i>      |
|              | BNI-ROELFS (BC <sub>5</sub> ) | 14.7     | 12.9     | 17.5      | 845     | Very Good | <i>b</i>           | <i>a</i>      | <i>d</i>      | <i>c</i>           | <i>h</i>      | <i>b</i>      |
|              |                               |          |          |           |         |           |                    |               |               |                    |               |               |
| Obregon 2020 | ROELF-Control                 | 13.0     | 11.2     | 16.0      | 765     | Good      | <i>b</i>           | <i>i</i>      | <i>d</i>      | <i>b</i>           | <i>h</i>      | <i>b</i>      |
|              | BNI-ROELFS (BC <sub>5</sub> ) | 13.8     | 12.0     | 15.0      | 725     | Fair      | <i>b</i>           | <i>i</i>      | <i>d</i>      | <i>c</i>           | <i>h</i>      | <i>b</i>      |
|              | BNI-ROELFS (BC <sub>7</sub> ) | 13.2     | 11.2     | 16.0      | 745     | Good      | <i>b</i>           | <i>i</i>      | <i>d</i>      | <i>b</i>           | <i>h</i>      | <i>b</i>      |
|              |                               |          |          |           |         |           |                    |               |               |                    |               |               |
| ElBatan2019  | MUNAL-control                 | 14.8     | 12.8     | 18.0      | 840     | Very Good | <i>b</i>           | <i>a</i>      | <i>d</i>      | <i>c</i>           | <i>h</i>      | <i>b</i>      |
|              | BNI-MUNAL (BC <sub>6</sub> )  | 14.1     | 12.2     | 18.5      | 800     | Good      | <i>b</i>           | <i>c</i>      | <i>d</i>      | <i>c</i>           | <i>h</i>      | <i>b</i>      |
|              |                               |          |          |           |         |           |                    |               |               |                    |               |               |
| ElBatan2020  | MUNAL-control                 | 13.8     | 11.9     | 13.5      | 790     | Very Good | <i>b</i>           | <i>a</i>      | <i>d</i>      | <i>c</i>           | <i>b</i>      | <i>b</i>      |
|              | BNI-MUNAL (BC <sub>6</sub> )  | 12.5     | 10.9     | 12.0      | 685     | Fair      | <i>b</i>           | <i>c</i>      | <i>d</i>      | <i>c</i>           | <i>h</i>      | <i>e</i>      |

**GPRO:** grain protein content; **FPRO:** flour protein content; **SDSS:** SDS-sedimentation volume; **LV:** bread loaf volume; **BCS:** bread crumb structure; **HMW-GS:** high molecular weight glutenin alleles; **LMW-GS:** low molecular weight glutenin alleles.

*Note: Nitrogen fertilizer application is 250 kg N ha<sup>-1</sup> in all the above field trials in Mexico*

**Table S8b. Seed protein levels of BNI-isogenic lines of MUNAL-control and BNI-MUNAL grown in JIRCAS field study in Japan (2019-2020) (Study 6a).**

| <b>Field study (2019-2020)</b>     | <b>Genetic stock</b> | <b>Nitrogen application (kg N ha<sup>-1</sup>)</b> | <b>Grain protein (%)</b> |
|------------------------------------|----------------------|----------------------------------------------------|--------------------------|
| JIRCAS field study, Tsukuba, Japan |                      |                                                    |                          |
|                                    | <b>MUNAL-control</b> | <b>0 kg N ha<sup>-1</sup></b>                      | <b>12.55</b>             |
|                                    | <b>BNI-MUNAL</b>     | <b>0 kg N ha<sup>-1</sup></b>                      | <b>12.18</b>             |
|                                    |                      |                                                    |                          |
|                                    | <b>MUNAL-control</b> | <b>250 kg N ha<sup>-1</sup></b>                    | <b>13.51</b>             |
|                                    | <b>BNI-MUNAL</b>     | <b>250 kg N ha<sup>-1</sup></b>                    | <b>12.74</b>             |
|                                    |                      |                                                    |                          |

**Table S9. Grain yield and days to maturity of BNI-MUNAL and BNI-ROELFS along with controls in two field sites of Obregon CIMMYT experimental station in Mexico during 2019 and 2020 season under high-N input (250 kg N ha<sup>-1</sup>) systems.**

| Wheat genetic stock           | Maturity (days)   |           |                   |                   | Grain Yield (t ha <sup>-1</sup> ) |           |                   |                   |
|-------------------------------|-------------------|-----------|-------------------|-------------------|-----------------------------------|-----------|-------------------|-------------------|
|                               | 2019              |           | 2020              |                   | 2019                              |           | 2020              |                   |
|                               | Obregon 1         | Obregon 2 | Obregon 1         | Obregon 2         | Obregon 1                         | Obregon 2 | Obregon 1         | Obregon 2         |
| MUNAL-control                 | 125               | 133       | 125               | 121               | 7.6                               | 5.5       | 7.2               | 6.8               |
| BNI-MUNAL (BC <sub>6</sub> )  | 129*              | 133       | 126 <sup>ns</sup> | 121 <sup>ns</sup> | 7.9 <sup>ns</sup>                 | 7.7*      | 7.9 <sup>ns</sup> | 6.6 <sup>ns</sup> |
|                               |                   |           |                   |                   |                                   |           |                   |                   |
| ROELFS-control                | 126               | 131       | 123               | 119               | 7.3                               | 6.7       | 7.5               | 7.0               |
| BNI-ROELFS (BC <sub>5</sub> ) | 127 <sup>ns</sup> | 134*      | 126*              | 122*              | 6.9 <sup>ns</sup>                 | 5.4*      | 6.3*              | 5.7*              |

*Note: The experimental design of the individual experiments was a randomized complete block and the combined ANOVA was done across years and sites. The statistical software used was SAS, Copyright © 2016 by SAS Institute Inc., Cary, NC, USA, SAS® Proprietary Software 9.4 (TS1M5) and the procedure used was a general linear model, GLM.*
